# Supplementary material
Source: PubMed Central journal article supplement (PMC5363312)
Supplement: mmc1.pdf [file mmc1.pdf]

## **Supplemental Information**

### **Rhesus iPSC Safe Harbor Gene-Editing Platform for Stable Expression of Transgenes in Differentiated Cells of All Germ Layers**

**So Gun Hong, Ravi Chandra Yada, Kyujoo Choi, Arnaud Carpentier, T. Jake Liang, Randall K. Merling, Colin L. Sweeney, Harry L. Malech, Moonjung Jung, Marcus A.F. Corat, Aisha A. AlJanahi, Yongshun Lin, Huimin Liu, Ilker Tunc, Xujing Wang, Maryknoll Palisoc, Stefania Pittaluga, Manfred Boehm, Thomas Winkler, Jizhong Zou, and Cynthia E. Dunbar**

## SUPPLEMENTARY MATERIAL

### a Human *PPP1R12C*

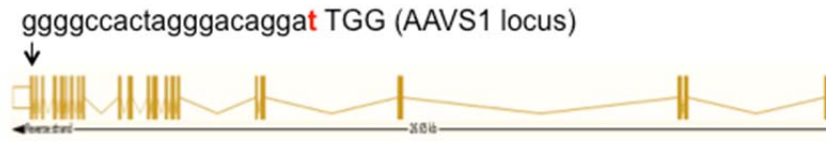

### Rhesus *PPP1R12C*

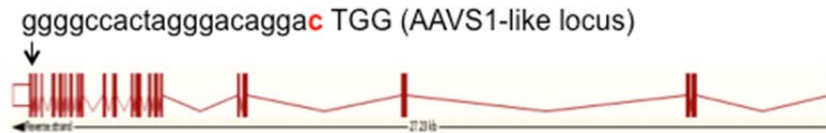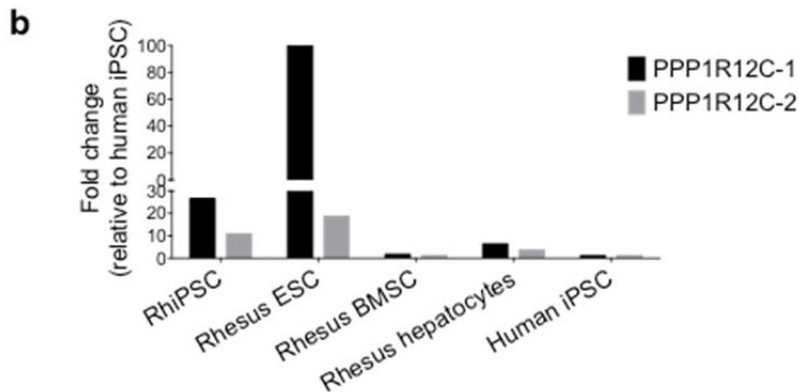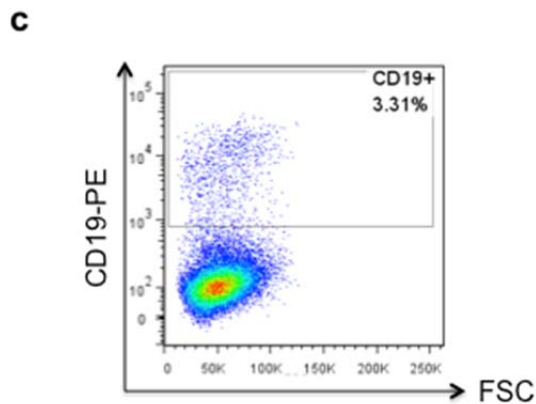

### Figure S1 CRISPR/Cas9-mediated targeting of rhesus macaque AAVS1

(a) Comparison of structure of the *PPP1R12C* gene and the AAVS1 site in the human and rhesus macaque genome. Small letters represent gRNA target sequences while capital letters indicate PAM sequences. Note that the last base pair of the gRNA target sequence is different between human and rhesus. (b) The rhesus *PPP1R12C* gene is expressed in various rhesus macaque cell types, including induced pluripotent stem cells (iPSC), embryonic stem cells (ESC), bone-marrow stromal cells (BMSC), and primary hepatocytes. Two different primer sets (PPP1R12C-1 and -2) were used to confirm the pattern of gene expression. (c) CD19 expression in 293T cells after transfection of the hΔCD19 donor plasmid

|                         |                              |               |
|-------------------------|------------------------------|---------------|
| Reference seq           | CCGTGGGGCCACTAGGGACAGGACTGGT | GAC           |
| <b>ZG15 M11-10</b>      | CCGTGGGGCCACTAGGGACAGGACTGGT | GAC           |
| ZG15 M11-10-CD19-7      | CCGTGGGGCCACTAGGG            | -----AC       |
| ZG15 M11-10-CD19-22     | CCGTGGGGCCACTAGGGACAG        | -ACTGGT       |
| ZG15 M11-10-GFP-5       | CCGTGGGGCCACTAGGGACAG        | -ACTGGT       |
| ZG15 M11-10-GFP-11      | CCGTGGGGCCACTAGG             | -----TGAC     |
| ZG15 M11-10-GFP-20      | CCGTGGGGCCACTAGGG            | -----G---TGGT |
| ZG15 M11-10-GFP-21      | CCGTGGGGCCACTAGGGACAG        | -A-----TGAC   |
| <b>ZG32-3-4</b>         | CCGTGGGGCCACTAGGGACAGGACTGGT | GAC           |
| <b>ZG32-3-4-CD19-11</b> | CCGTGGGGCCACTAGGGACAGGACTGGT | GAC           |
| ZG32-3-4-GFP-10         | CCGTGGGGCCACTAGGG            | -----TGAC     |
| <b>ZH26-HS41</b>        | CCGTGGGGCCACTAGGGACAGGACTGGT | GAC           |
| ZH26-HS41-CD19-3        | CCGTGGGGCCACTAGGGACAG        | -ACTGGT       |

**Figure S2 On-target mutations in non-targeted alleles**

The AAVS1 locus in a non-targeted allele of CRISPR/Cas9-edited clones was sequenced. Parental RhiPSC clones were highlighted in bold. The clone with intact non-targeted allele without any mutation is highlighted in red. The boxes indicate the 20 bp gRNA-targeting sequence and the 3 bp protospacer-associated motif or PAM (Chromosome 19:61115591-61115613). Red highlight indicates mismatches compared to the rhesus macaque reference sequence.

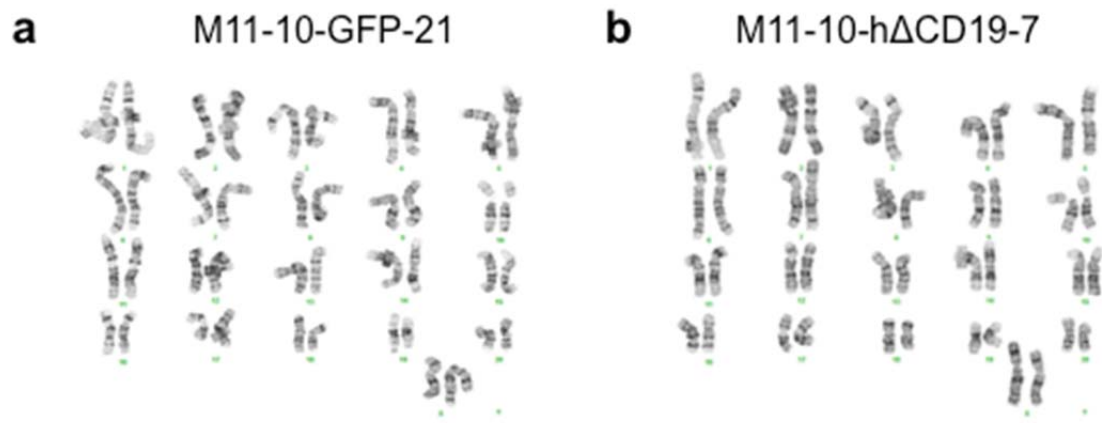

**Figure S3** CRISPR/Cas9-edited clones maintained normal karyotype, representative examples are shown.

**a**

| Animal ID | RhiPSC clone        | Predicted off-target site |   |   |   |     |   |   |      |   |    |
|-----------|---------------------|---------------------------|---|---|---|-----|---|---|------|---|----|
|           |                     | 1                         | 2 | 3 | 4 | 5   | 6 | 7 | 8    | 9 | 10 |
| ZG15      | ZG15-M11-10-CD19-7  |                           |   |   |   |     |   |   |      |   |    |
|           | ZG15-M11-10-CD19-22 |                           |   |   |   |     |   |   | -19  |   |    |
|           | ZG15-M11-10-GFP-5   |                           |   |   |   | *   |   |   | +1   |   |    |
|           | ZG15-M11-10-GFP-11  |                           |   |   |   |     |   |   |      |   |    |
|           | ZG15-M11-10-GFP-20  |                           |   |   |   |     |   |   |      |   |    |
|           | ZG15-M11-10-GFP-21  |                           |   |   |   |     |   |   |      |   |    |
| ZG32      | ZG32-3-4-CD19-11    |                           |   |   |   | -48 |   |   | -5   |   |    |
|           | ZG32-3-4-GFP-10     |                           |   |   |   |     |   |   | +212 |   |    |
| ZH26      | ZH26-HS41-CD19-3    |                           |   |   |   | -9  |   |   | **   |   |    |
|           | ZH26-HS41-CD19-7    |                           |   |   |   |     |   |   |      |   |    |

\*-38, -162; \*\*-5, -13, -23

**b**

**ZH26-HS41-CD19-3**

|     |                                                               |  |    |  |      |
|-----|---------------------------------------------------------------|--|----|--|------|
| OT5 | TCCTTCACCAGGTTAGGGGACCATGAGGGACAGGACTGGCTCTCAGCCTAAGGAGCACTCA |  | wt |  |      |
|     | TCCTTCACCAGGTTAGGGGACCATGAGGGACAGGACTGGCTCTCAGCCTAAGGAGCACTCA |  |    |  |      |
|     | TCCTTCACCAGGTTAGGGGACCATGAGGGACAGGACTGGCTCTCAGCCTAAGGAGCACTCA |  |    |  |      |
|     | TCCTTCACCAGGTTAGGGGACCATGAGGGACAGGACTGGCTCTCAGCCTAAGGAGCACTCA |  |    |  |      |
|     | TCCTTCACCAGGTTAGGGGACCATG-----ACTGGCTCTCAGCCTAAGGAGCACTCA     |  |    |  | -9bp |
|     | TCCTTCACCAGGTTAGGGGACCATG-----ACTGGCTCTCAGCCTAAGGAGCACTCA     |  |    |  |      |

**ZG15-M11-10-CD19-22**

|     |                                                                    |  |    |  |       |
|-----|--------------------------------------------------------------------|--|----|--|-------|
| OT8 | GCATAGAGGGCCCTGGGGAGCACTAAGGACAGGACCGGGGGACCCTCCAGTCTGAGGTAGAACTCT |  | wt |  |       |
|     | GCATAGAGGGCCCTGGGGAGCACTAAGGACAGGACCGGGGGACCCTCCAGTCTGAGGTAGAACTCT |  |    |  |       |
|     | GCATAGAGGGCCCTGGGGAGCACTAAGGACAGGACCGGGGGACCCTCCAGTCTGAGGTAGAACTCT |  |    |  |       |
|     | GCATAGAGGGCCCTGGGGAGCACTAAGGACAGGACCGGGGGACCCTCCAGTCTGAGGTAGAACTCT |  |    |  |       |
|     | GCATAGAGGGCCCTGGGA-----GGGACCCTCCAGTCTGAGGTAGAACTCT                |  |    |  | -19bp |
|     | GCATAGAGGGCCCTGGGA-----GGGACCCTCCAGTCTGAGGTAGAACTCT                |  |    |  |       |

**Figure S4** Off-target analysis of CRISPR/Cas9 system

(a) Summary of off-target analysis in six RhiPSC clones. The top 10 potential off-target sites were sequenced. Red: Insertions/deletions (indels) were found at the off-target site with the respective size of indel(s) denoted. White: No mutation was found at the off-target site. (b) After off-target PCR, TOPO cloning was performed to identify exact sequence of the indels. Representative sequencing results of off-target sites five and eight are from clones ZH26-HS41-CD19-3 and ZG15-M11-10-CD19-22, respectively. The boxes indicate the 20 bp off-target sequence and the 3 bp PAM sequence.

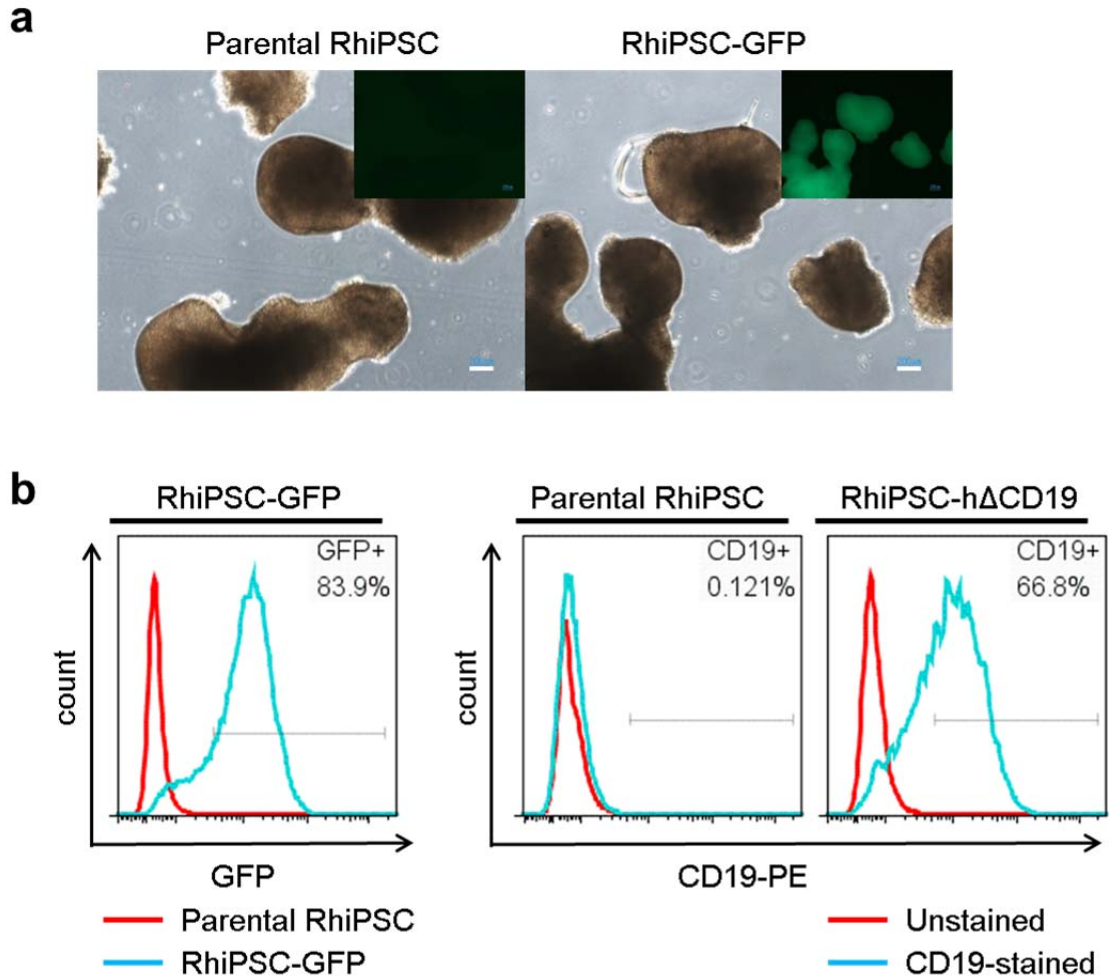

**Figure S5 Stable transgene expression in CRISPR/Cas9-edited clones after *in vitro* spontaneous differentiation**

(a) Representative images of embryoid bodies (EBs) derived from parental RhiPSC (left) and edited clones (right) on 15 days of differentiation. Scale bars, 200  $\mu$ m (b) Flow analysis confirmed stable transgene expression in EBs from both RhiPSC-GFP (left) and RhiPSC-h $\Delta$ CD19 (right) clones.

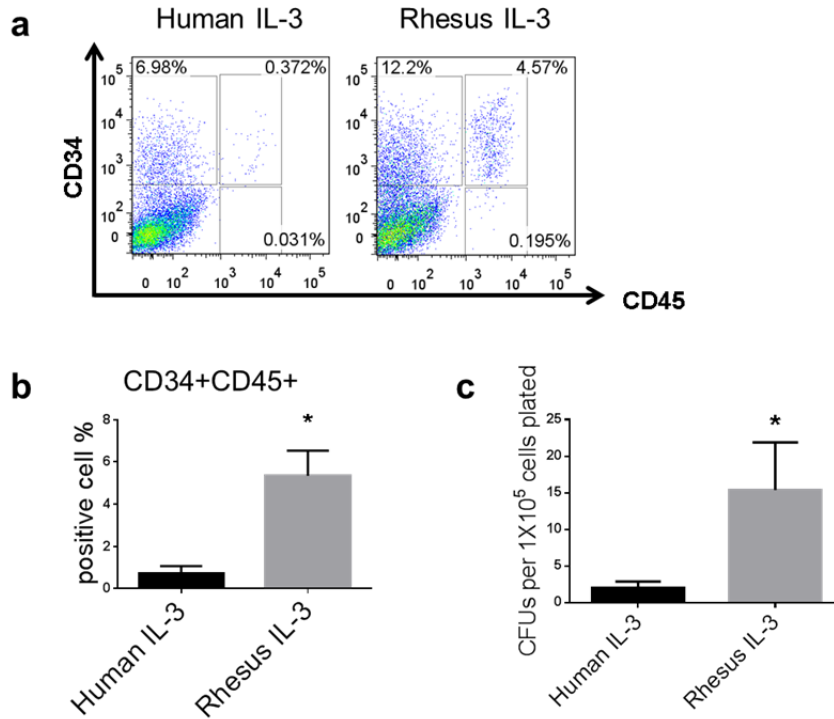

**Figure S6 Effect of rhesus IL-3 versus human IL-3 on RhiPSC hematopoietic differentiation**

(a) CD34+CD45+ cells were detected at the end of differentiation by flow cytometry.

Representative flow cytometry plot comparing hematopoietic differentiation from RhiPSC with human versus rhesus IL-3 at a concentration of 10 ng/ml is shown. (b) A summary graph of flow cytometry analysis from 3 independent experiments. (c) Number of CFU colonies from

CD34+CD45+ cells differentiated using either human or rhesus IL-3. In all bar graphs, the final result given for a sample represents the mean and standard error of the mean. Student's t-tests, \* $P < 0.05$ ,  $n=3$

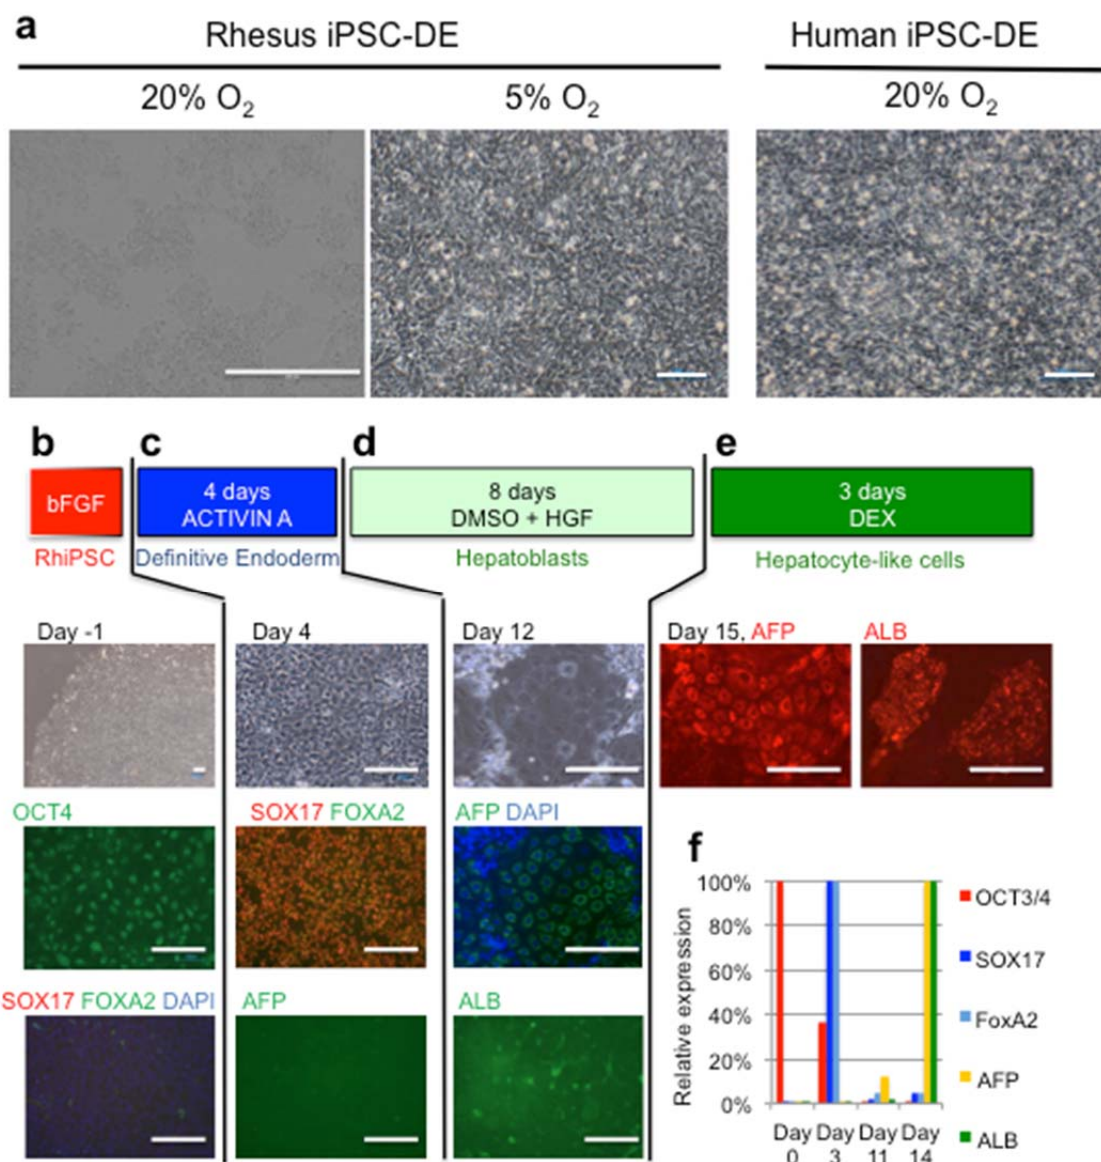

**Figure S7 Establishment of hepatic differentiation protocol for RhiPSC**

(a) 5% O<sub>2</sub> hypoxic culture was required for definitive endoderm (DE) induction from RhiPSC (b) Undifferentiated RhiPSCs before hepatic differentiation (c) After 4 days, RhiPSC-DE cells expressed SOX17 and FOXA2, but not AFP. (d) By Day 12, AFP+ hepatoblasts were derived. (e) After dexamethasone treatment, ALB+ hepatocyte-like cells were observed. (f) RT-PCR analysis of relevant transcripts during differentiation. Scale bars, 200 μm.



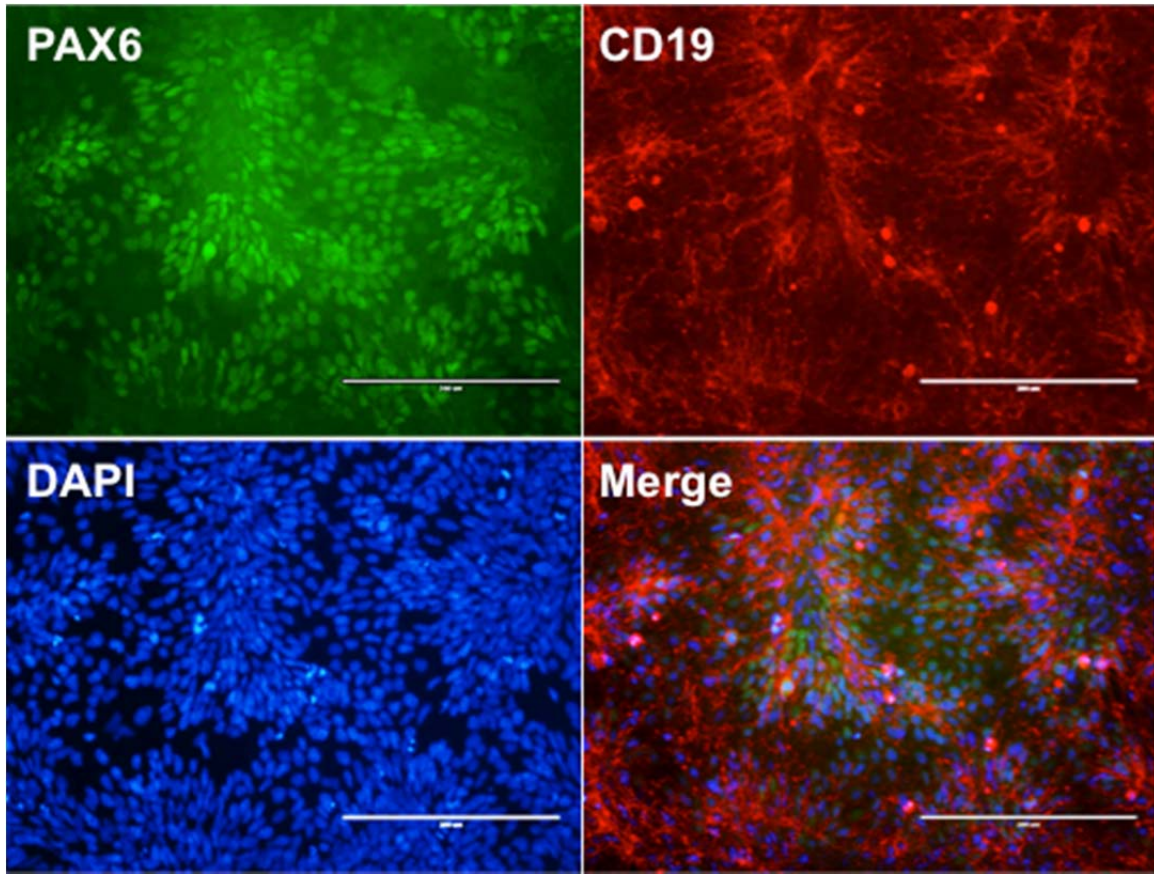

**Figure S8 Ectodermal differentiation from edited RhiPSCs**  
RhiPSC-h $\Delta$ CD19-7-derived neural stem cells co-expressed early neural marker, Pax6 and the transgene (h $\Delta$ CD19). Scale bars, 200  $\mu$ m.

**Table S1 Top 10 potential off-target sites**

|    | <b>Off-target Sequence</b> | <b>PAM</b> | <b>Chr</b> | <b>Position</b> | <b>Strand</b> | <b>MM Locations</b> | <b># of MMs</b> | <b>Score</b> | <b>Overlapping Gene<sup>a</sup></b> |
|----|----------------------------|------------|------------|-----------------|---------------|---------------------|-----------------|--------------|-------------------------------------|
| 1  | AGGGCCACTT<br>GGGACAGGAC   | TAG        | 4          | 7769928<br>4    | -             | 1,10                | 2               | 7.414830508  | None                                |
| 2  | GGCCCCACTA<br>GGGACAGGAC   | AAG        | 3          | 1603552<br>67   | +             | 3,4                 | 2               | 5.146703297  | CADPS2 <sup>b</sup>                 |
| 3  | GGGGCCAGTG<br>GGGACAGGAC   | AGG        | 13         | 1272827<br>74   | -             | 8,10                | 2               | 5.028448276  | None                                |
| 4  | GGCCCCATTA<br>GGGACAGGAC   | CAG        | 1          | 1853601<br>6    | +             | 3,4,8               | 3               | 2.448888889  | None                                |
| 5  | GGGACCATGA<br>GGGACAGGAC   | TGG        | 19         | 1914504<br>6    | -             | 4,8,9               | 3               | 1.51751634   | ENSMMUG0<br>0000003164 <sup>b</sup> |
| 6  | GGGGGCAGCA<br>GGGACAGGAC   | TGG        | 17         | 9356319<br>1    | -             | 5,8,9               | 3               | 1.482630907  | None                                |
| 7  | GGAGCTAATA<br>GGGACAGGAC   | TGG        | 14         | 3006406<br>2    | -             | 3,6,8               | 3               | 1.481577778  | None                                |
| 8  | GGGAGCACTA<br>AGGACAGGAC   | CGG        | 7          | 4697801<br>8    | -             | 4,5,11              | 3               | 1.446502058  | ITGA11 <sup>b</sup>                 |
| 9  | GGGAGCAGTG<br>GGGACAGGAC   | TGG        | 11         | 3181345         | -             | 4,5,8,10            | 4               | 1.257112069  | None                                |
| 10 | GGGGCCAGTG<br>GGGACAGGAA   | GGG        | 12         | 9580652<br>3    | -             | 8,10,20             | 3               | 1.141953521  | None                                |

MM stands for Mismatch.

<sup>a</sup>Gene information was found using BLAT online analysis ([www.ensembl.org](http://www.ensembl.org)).

<sup>b</sup>Off-target sequence is located in the intron of the corresponding gene.

**Table S2 List of primers and probes used in this study**

| Assay                                  | Gene/Target                  | Forward sequence (5'-3')                        | Reverse sequence (5'-3')                          |
|----------------------------------------|------------------------------|-------------------------------------------------|---------------------------------------------------|
| Gibson Assembly                        | Rhesus AAVS1 5' homology arm | tatgaccatgattacgccgccacctctt<br>caggttccagcttct | tatgctatacgaagttatgcctgtcctagtggcccc<br>acggtggg  |
|                                        | Rhesus AAVS1 3' homology arm | agtcagtgagaatattgttactggtga<br>caaaaagcccatct   | taaaacgacggccagtgtttcggagcagggcctta<br>gggaagaggg |
|                                        | hΔCD19                       | tcattttggcaaagaattgtatgccacctc<br>ctcgctctcttct | gcacctgaggagtgaattcattagaatctcctggg<br>gggtcagtc  |
| PCR screening for targeted integration |                              | tcctgcttccactgacctgc                            | ggctgtactcggctacatctag                            |
| PPP1R12C expression                    | PPP1R12C-1 (primer #1)       | aggtggtgcgcttcttggtg                            | tgttgacggcggcgatgtg                               |
|                                        | PPP1R12C-2 (primer #2)       | tggtgcgcttcttggtggag                            | tgttgacggcggcgatgtg                               |
| T7E1 assay                             | RhAAVS1                      | tgctttcttgcctggacac                             | tgatgcacaggaacagtac                               |
| Off-target analysis                    | OT-1                         | agagagtgtgtaggtgggtatt                          | gcctcttgaatggtgctataa                             |
|                                        | OT-2                         | aaagttcaaagtggagacagga                          | aagagcaagcaggggtgtta                              |
|                                        | OT-3                         | ccaggttagaggaggcataaac                          | ggaactgaagagatgcccaa                              |
|                                        | OT-4                         | ttgaaccgtgctcctagc                              | gctggacttcaggcctattt                              |
|                                        | OT-5                         | gctcatcttgagagagagaagaaa                        | gctgtagcgggttatttgaatg                            |
|                                        | OT-6                         | atgcacaagcgtgcctt                               | atccatgaagcctccaagatg                             |
|                                        | OT-7                         | ttctggtggttacacttcattca                         | agggctctttgacagatcattac                           |
|                                        | OT-8                         | ggttactgttcttagccactgt                          | gactcagggaatgcgtttct                              |
|                                        | OT-9                         | tgtgaggtactgtgcctgga                            | gaaaggcattgcattagga                               |
|                                        | OT-10                        | tccacctctcaggttcaagc                            | acccaaggaaccttgcctt                               |

OT: predicted potential off-target locus
