# Supplementary material
Source: PubMed Central journal article supplement (PMC5363312)
Supplement: mmc2.pdf [file mmc2.pdf]

# Rhesus iPSC Safe Harbor Gene-Editing Platform for Stable Expression of Transgenes in Differentiated Cells of All Germ Layers

So Gun Hong,<sup>1,10</sup> Ravi Chandra Yada,<sup>1,10</sup> Kyujoo Choi,<sup>1</sup> Arnaud Carpentier,<sup>2</sup> T. Jake Liang,<sup>2</sup> Randall K. Merling,<sup>3</sup> Colin L. Sweeney,<sup>3</sup> Harry L. Malech,<sup>3</sup> Moonjung Jung,<sup>1</sup> Marcus A.F. Corat,<sup>1,4</sup> Aisha A. AlJanahi,<sup>1,5</sup> Yongshun Lin,<sup>6</sup> Huimin Liu,<sup>6</sup> Ilker Tunc,<sup>7</sup> Xujing Wang,<sup>7</sup> Maryknoll Palisoc,<sup>8</sup> Stefania Pittaluga,<sup>8</sup> Manfred Boehm,<sup>9</sup> Thomas Winkler,<sup>1</sup> Jizhong Zou,<sup>6</sup> and Cynthia E. Dunbar<sup>1</sup>

<sup>1</sup>Hematology Branch, National Heart, Lung and Blood Institute (NHLBI), NIH, Bethesda, MD 20892, USA; <sup>2</sup>Liver Diseases Branch, National Institute of Diabetes and Digestive and Kidney Diseases, NIH, Bethesda, MD 20892, USA; <sup>3</sup>Laboratory of Host Defenses, National Institute of Allergy and Infectious Diseases, NIH, Bethesda, MD 20892, USA; <sup>4</sup>Multidisciplinary Center for Biological Research, University of Campinas, Campinas, SP 13083-877, Brazil; <sup>5</sup>Department of Chemistry and Molecular & Cellular Biology, Georgetown University, Washington, D.C. 20057, USA; <sup>6</sup>iPSC Core, Center for Molecular Medicine, NHLBI, NIH, Bethesda, MD 20892, USA; <sup>7</sup>Systems Biology Core, Systems Biology Center, NHLBI, NIH, Bethesda, MD 20892, USA; <sup>8</sup>Laboratory of Pathology, Center for Cancer Research, National Cancer Institute, NIH, Bethesda, MD 20892, USA; <sup>9</sup>Laboratory of Cardiovascular Regenerative Medicine, NHLBI, NIH, Bethesda, MD 20892, USA

**Nonhuman primate (NHP) induced pluripotent stem cells (iPSCs) offer the opportunity to investigate the safety, feasibility, and efficacy of proposed iPSC-derived cellular delivery in clinically relevant in vivo models. However, there is need for stable, robust, and safe labeling methods for NHP iPSCs and their differentiated lineages to study survival, proliferation, tissue integration, and biodistribution following transplantation. Here we investigate the utility of the adeno-associated virus integration site 1 (AAVS1) as a safe harbor for the addition of transgenes in our rhesus macaque iPSC (RhiPSC) model. A clinically relevant marker gene, human truncated CD19 (h $\Delta$ CD19), or GFP was inserted into the AAVS1 site in RhiPSCs using the CRISPR/Cas9 system. Genetically modified RhiPSCs maintained normal karyotype and pluripotency, and these clones were able to further differentiate into all three germ layers in vitro and in vivo. In contrast to transgene delivery using randomly integrating viral vectors, AAVS1 targeting allowed stable transgene expression following differentiation. Off-target mutations were observed in some edited clones, highlighting the importance of careful characterization of these cells prior to downstream applications. Genetically marked RhiPSCs will be useful to further advance clinically relevant models for iPSC-based cell therapies.**

## INTRODUCTION

The combination of somatic cell reprogramming and powerful new gene editing methods is poised to revolutionize personalized cell-based therapies for inherited and acquired diseases. However, preclinical investigation of safety and efficacy is required before moving these treatment modalities into human clinical trials. Nonhuman primate (NHP) induced pluripotent stem cells (iPSCs) have been valuable resources to model iPSC-based cell therapies in clinically relevant

settings.<sup>1–4</sup> The close phylogenetic relationship of NHPs to humans, as well as their size, longevity, and the well-developed understanding of NHP physiology, makes these models very well suited to preclinical iPSC development. The ability to track derivation of tissues from iPSCs is necessary; thus, engineering NHP iPSCs to strongly and stably express reporter genes is desirable for monitoring of autologous or allogeneic transplanted cells in vivo. Additionally, development of these methodologies with reporter genes potentially paves the way for therapeutic gene addition or correction in iPSCs and their progeny.

Traditional methods of non-targeted gene transfer using viral vectors often suffer from transgene silencing during differentiation of PSCs.<sup>5–7</sup> Genomic safe harbors (GSHs) refer to regions in the genome that permit sufficient expression of newly integrated DNA without adverse effects on the host cell or organism.<sup>8</sup> Although specific loci or general criteria identifying prospective GSHs have been proposed,<sup>8,9</sup> no GSH has yet been fully validated in a large animal model or a clinical setting.<sup>10</sup> Adeno-associated virus integration site 1 (AAVS1) locus in the first intron of *PPP1R12C* gene is one of most commonly used GSH sites in human cell studies. The AAVS1 locus has an open chromatin configuration in a variety of human cell types, including iPSCs, making this site readily accessible to site-specific endonucleases.<sup>11</sup> Genes introduced into the AAVS1 site in human PSCs showed stable expression after in vitro and in vivo differentiation.<sup>5,12–15</sup> The clustered regularly interspaced short palindromic

Received 22 April 2016; accepted 31 October 2016;  
<http://dx.doi.org/10.1016/j.ymthe.2016.10.007>.

<sup>10</sup>These authors contributed equally to this work.

**Correspondence:** So Gun Hong, NHLBI, NIH, Bld 10-CRC, Room 3-3216, 9000 Rockville Pike, Bethesda, MD 20892, USA.

**E-mail:** [sogun.hong@nih.gov](mailto:sogun.hong@nih.gov)

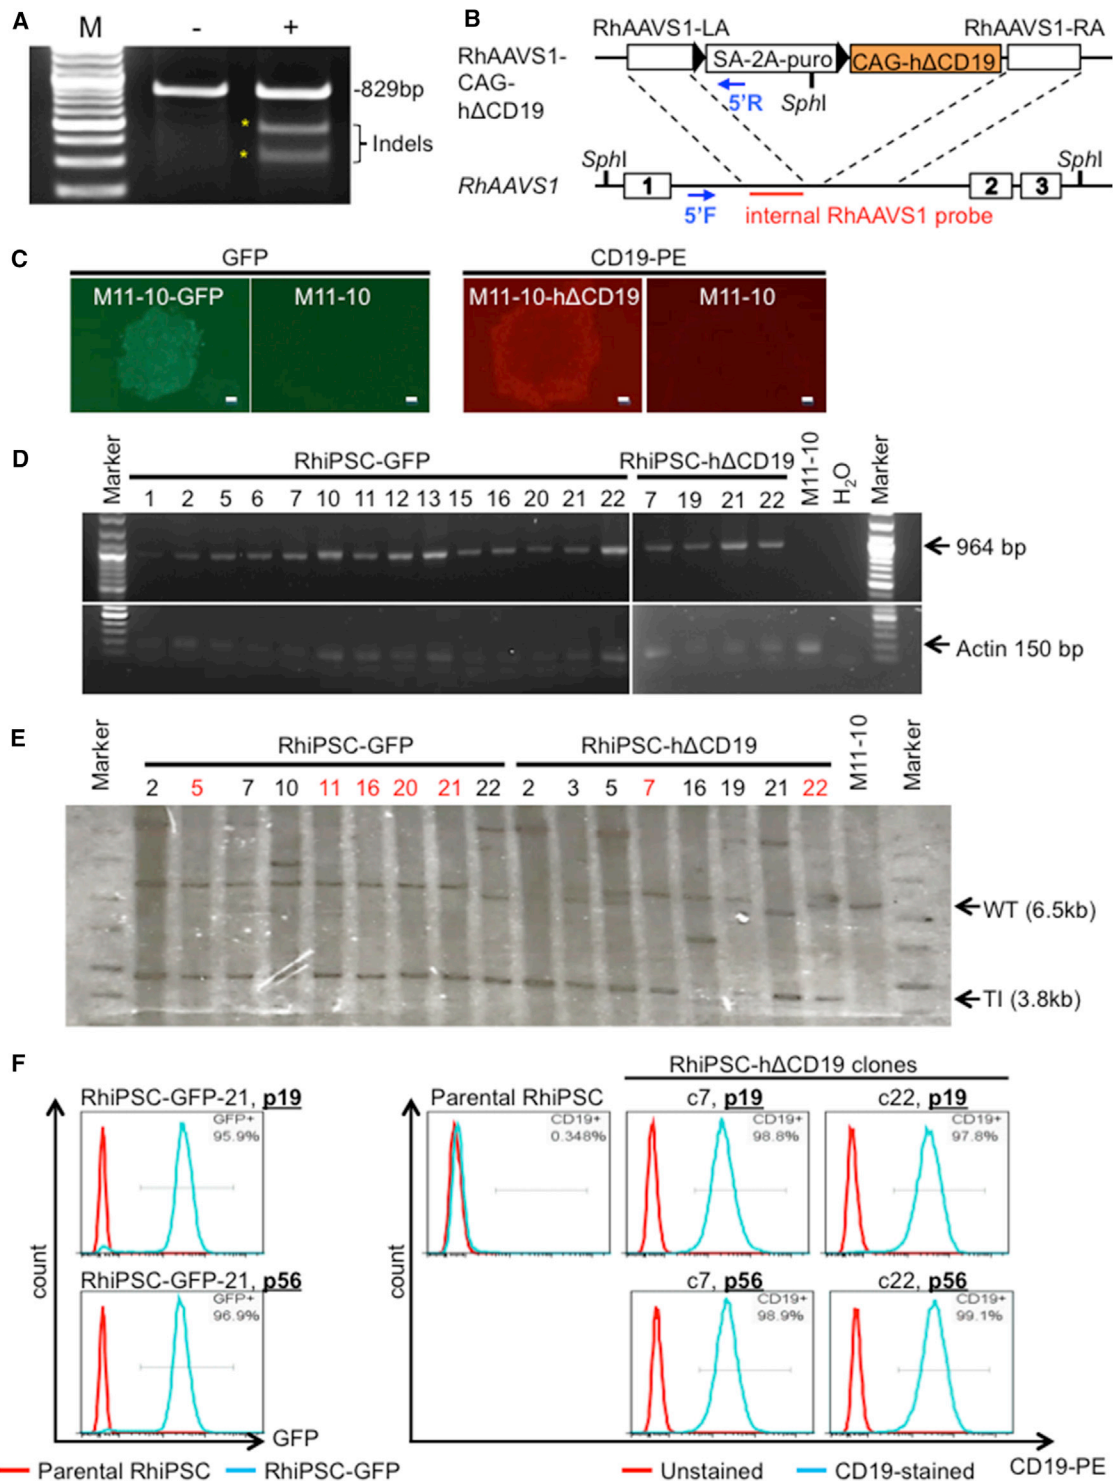

**Figure 1. Generation of Targeted Rhesus iPSC Clones Using CRISPR/Cas9 System**

(A) Cutting efficiency of the rhesus AAVS1 gRNA was 46% in the rhesus FRhK-4 cell line by the T7E1 assay. (B) The rhesus AAVS1-CAG-human truncated CD19 (hΔCD19) donor plasmid was modified from human AAVS1-CAG-copGFP vector by replacing the human AAVS1 homology arms with orthologous rhesus AAVS1 sequences and the GFP cDNA with hΔCD19. (C) GFP- or hΔCD19-expressing RhiPSC colonies following nucleofection and puromycin selection. The GFP clone is shown under UV light, and

(legend continued on next page)

**Table 1. Summary of CRISPR/Cas9-Mediated Gene Editing in RhiPSCs**

| Parental iPSC Clone | Reporter Gene | Targeted Insertion <sup>a</sup> | Single-Copy Integration <sup>b</sup> | Off-Target Mutations <sup>c</sup> |
|---------------------|---------------|---------------------------------|--------------------------------------|-----------------------------------|
| ZG15-M11-10         | hΔCD19        | 8/8                             | 2/8                                  | 1/2                               |
|                     | GFP           | 14/14                           | 5/9                                  | 1/4                               |
| ZG32-3-4            | hΔCD19        | 4/4                             | 2/4                                  | 1/1                               |
|                     | GFP           | 4/4                             | 1/4                                  | 1/1                               |
| ZH26-HS41           | hΔCD19        | 5/5                             | 2/5                                  | 1/2                               |
| Total               |               | 35/35 (100%)                    | 12/30 (40%)                          | 5/10 (50%)                        |

<sup>a</sup>Clones with targeted integration/transgene-positive clones, based on PCR analysis.

<sup>b</sup>Monoallelic clones without random integration/clones with targeted integration, based on Southern blot analysis. The rest of colonies had additional random integration event or events, as well as the targeted integration event.

<sup>c</sup>Clones with off-target mutations/clones with single-copy integration, based on Sanger sequencing.

repeats (CRISPR)/CRISPR-associated nuclease 9 (Cas9) system is a highly efficient RNA-guided DNA nuclease system modified from an adaptive immune system of bacteria and archaea to allow sequence-specific genome editing in human cells.<sup>16–18</sup> Recent reports have indicated that the CRISPR/Cas9 system can be used for genetic modification in NHPs; however, this approach has not yet been applied to insert genes of interest into the AAVS1 safe harbor in NHP PSCs.<sup>19–21</sup>

We have identified a CRISPR/Cas9 target sequence in the rhesus macaque *PPP1R12C* gene, generated safe harbor-targeted rhesus macaque iPSC (RhiPSC) lines with two relevant marker genes, and documented the stability of expression both in iPSCs and after differentiation to tissues of interest. Genes encoding human truncated CD19 (hΔCD19) or GFP were chosen as reporters. GFP provides convenient and reliable in vivo imaging, but it is highly immunogenic and can result in a substantial loss of gene expression in immunocompetent recipients. The hΔCD19 is desirable for preclinical studies because it has not induced immune rejection in humans or NHPs.<sup>22,23</sup> To evaluate transgene stability in clinically relevant cells, we assessed expression of the transgene in directed differentiated cells representing all three germ layers. The AAVS1-targeting strategy combined with differentiation protocols described in this manuscript provides a foundation for the development of preclinical models for iPSC-based cell therapies.

## RESULTS

### Generation of AAVS1-Targeted RhiPSC Clones via CRISPR/Cas9

The human AAVS1 locus is located in the first intron of the *PPP1R12C* gene on chromosome 19, and it is actively expressed in human pluripotent as well as differentiated cells, making it an

attractive target for the introduction of a marker or other transgenes.<sup>8,12</sup> The rhesus *PPP1R12C* gene also is located on chromosome 19, and it has a comparable gene structure to the human ortholog, consisting of 22 exons, with 95% amino acid homology (Figure S1). We confirmed that rhesus *PPP1R12C* mRNA (Ensembl: ENSMMUT00000030906) was expressed in various rhesus cell types, including iPSCs, bone marrow stromal cells, and primary hepatocytes (Figure S1).

Next, we identified a CRISPR/Cas9 guide RNA (gRNA) intronic target sequence (ggggccactaggacaggaCtgg), which differs only at a single base compared to a highly efficient target sequence (ggggccactaggacaggaTtgg) found at the human AAVS1 site.<sup>17</sup> We subsequently cloned this sequence into an all-in-one CRISPR/Cas9 plasmid expression vector. The cutting efficiency of this gRNA was 46%, as determined by the T7 endonuclease I (T7E1) assay performed in a fetal rhesus monkey kidney cell line, FRhK-4 (Figure 1A). A donor plasmid containing the hΔCD19 marker gene was constructed (Figure 1B), and CD19 expression from this plasmid was confirmed in 293T cells (Figure S1). The CRISPR/Cas9/gRNA and donor plasmids (GFP or hΔCD19) were delivered via nucleofection to three RhiPSC lines derived from three independent animals. After puromycin selection, GFP- or hΔCD19-positive colonies were manually picked and expanded for further characterization (Figure 1C). All RhiPSC clones tested had targeted integration of GFP or hΔCD19 at the intended AAVS1 site, confirmed by PCR (Figure 1D; Table 1). A total of 30 targeted clones were screened by Southern blot analysis. Among them, 12 clones had the desired monoallelic transgene insertion, without any additional random genomic insertions (Figure 1E; Table 1). The AAVS1 locus of the non-targeted allele was sequenced in each clone to detect any on-target mutations. The majority of clones (eight of nine tested) had various insertions or deletions (indels) at the non-targeted allele, leaving one of nine clones with an intact wild-type allele (Figure S2). The targeted clones maintained a normal karyotype (Figure S3), and they showed stable transgene expression during 7 months of in vitro culture (Figure 1F).

### Off-Target Analysis

To investigate off-target (OT) effects of our CRISPR/Cas9 system in RhiPSCs, potential OT sites were identified based on a recently published algorithm<sup>24</sup> (Table S1). Among those, the top ten potential off-target sites were sequenced in ten edited RhiPSC clones. Based on BLAT online analysis, off-target site 2 (OT2), OT5, and OT8 located in the intron of CADPS2, ENSMMUG00000003164, and ITGA11, respectively, while other loci did not overlap with any gene. Sequencing analysis revealed that five of ten clones had mutations in OT5 and/or OT8, suggesting higher frequency of off-target events at gene-related sites among the top ten off-target sites

the hΔCD19 clone is shown with anti-CD19 live staining. M11-10, unedited parental clone. Scale bars, 200 μm. (D) Puromycin-resistant and GFP- or hΔCD19-expressing CRISPR/Cas9-edited clones were plucked, isolated, and subjected to PCR screening for targeted integration, using one primer within the cassette and one outside in the predicted remaining AAVS1 genomic sequences. All puromycin-resistant and GFP- or hΔCD19-expressing clones tested had integration at the AAVS1 site. (E) Southern blot was performed to exclude RhiPSC clones with additional transgene integrations (labeled with black numbers). Red numbers indicate clones had single targeted integrations at the AAVS1 site. WT, wild-type; TI, targeted integration. (F) Transgene expression was maintained after long-term culture.

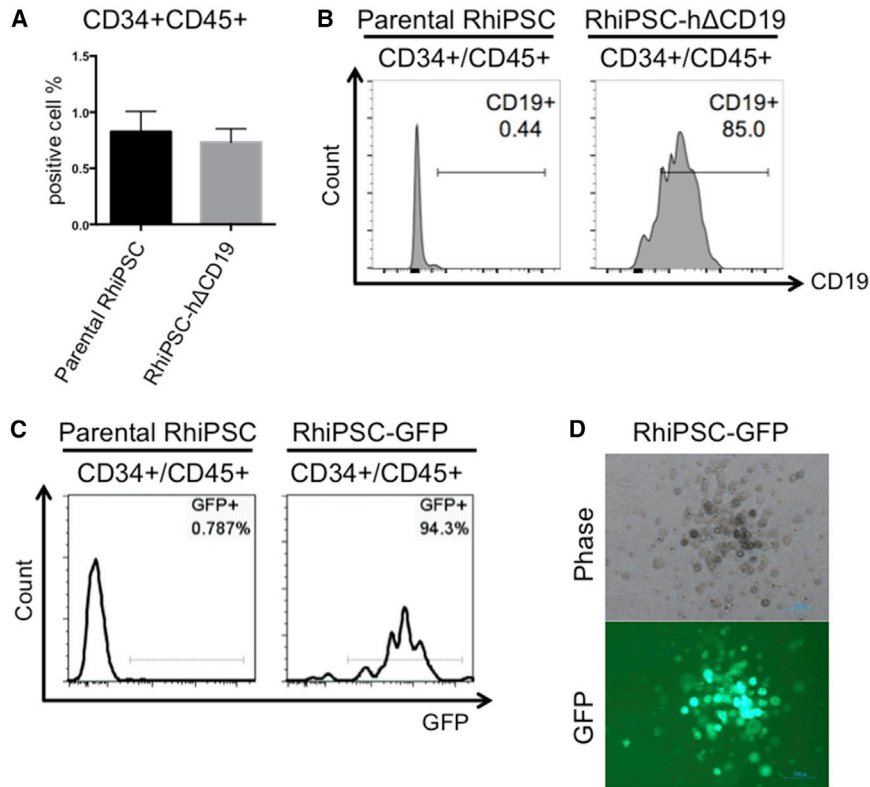

**Figure 2. Hematopoietic Differentiation from Genetically Modified RhiPSCs**

(A) A summary graph of flow cytometry analysis comparing hematopoietic differentiation from RhiPSC-h $\Delta$ CD19 versus unedited clones. There was no significant difference between groups (Student's *t* tests,  $p = 0.6620$ ,  $n = 3$ ). Error bars indicate SEM. (B and C) CD34+CD45+ cells derived from RhiPSC-h $\Delta$ CD19 (B) and RhiPSC-GFP (C) clones maintained transgene expression after differentiation. (D) A representative image of transgene (GFP) expression from a CFU-M derived from hematopoietic differentiation of the RhiPSC-GFP-21 clone. A total of 24 colonies were produced in this differentiation experiment and 24 of 24 were GFP positive.

(Table 1; Figure S4). Precise sequences of indels were confirmed by subcloning of PCR fragments (Figure S4). Indels ranged from 5- to 162-bp deletions; however, we also confirmed a large insertion (212 bp) into the OT8 site of one clone, which matched the sequence near the left homology arm of the donor plasmid DNA.

#### Stable Expression of Transgene in Edited RhiPSC Clones following In Vitro Spontaneous Differentiation

Among clones that were confirmed to have monoallelic integration of transgenes by Southern blot, two CD19 clones (clones 7 and 22 derived from parental ZG15-M11-10 iPSC) and two GFP clones (clones 5 and 21 derived from ZG15-M11-10 iPSC) were chosen for further in vitro and in vivo differentiation. Of note, subsequent analysis revealed that two of these clones (CD19-22 and GFP-5) had off-target mutations (Figure S4). Embryoid body (EB) formation was induced in the edited RhiPSC clones to monitor expression of the transgenes following spontaneous in vitro differentiation. After 15 days of culture, EB cells maintained strong expression of GFP or h $\Delta$ CD19 (Figure S5).

#### Mesodermal Differentiation from Edited RhiPSC Clones

We then investigated whether genetically modified RhiPSCs could generate clinically relevant target tissues while maintaining stable expression of transgenes. Differentiation of rhesus PSCs into mesodermally derived hematopoietic stem/progenitor cells (HSPCs) using human protocols has been known to be extremely inefficient.<sup>25</sup> We

speculated that inefficient rhesus receptor activation by some human cytokines, particularly IL-3, could be a principal reason for the relatively low differentiation efficiency, given significant protein sequence differences between rhesus and human IL-3 and documented inefficient activity of human IL-3 on rhesus hematopoietic cells.<sup>26</sup> We compared the effect of human IL-3 versus rhesus IL-3 during hematopoietic differentiation from RhiPSCs. Rhesus IL-3 significantly increased the number of CD34/45 (0.7% versus 5.4%, respectively) cells measured by flow cytometry on day 20 of

differentiation as well as the output of colony-forming units (CFUs, Figure S6). The HSPC differentiation capacity of genetically modified RhiPSCs was comparable to the parental RhiPSC, with the majority of differentiated cells expressing transgenes (Figures 2A–2D). Similarly RhiPSC-derived cardiomyocytes, defined by positive troponin I staining, co-expressed the h $\Delta$ CD19 (Figure 3).

#### Endodermal Differentiation from Edited RhiPSCs

We also investigated whether edited clones could be differentiated into endoderm-derived cells. We adapted a recently published protocol that described the derivation of functional hepatocyte-like cells from human embryonic stem cells (ESCs) and iPSCs.<sup>27,28</sup> Although the kinetics of hepatic differentiation of RhiPSCs was similar to that of human iPSCs, we found that hypoxic culture (5% O<sub>2</sub>) during definitive endoderm induction was necessary in RhiPSC differentiation (Figure S7). After 4 days of differentiation, pluripotent genes were downregulated and RhiPSCs generated homogeneous definitive endoderm, which expressed SOX17 and FOXA2. Hepatoblasts, expressing alpha-fetoprotein (AFP) but no albumin (ALB), were present by day 12, and, following the addition of dexamethasone, ALB+ hepatocyte-like cells were observed by day 15. The efficiency of generation of hepatocyte-like cells was lower from all RhiPSC clones as compared to human iPSC clones, indicating some species differences and room for further optimization. However, edited RhiPSC clones generated hepatocyte-like cells co-expressing ALB and the knocked-in transgenes (Figure 4A). Marker genes were expressed throughout the

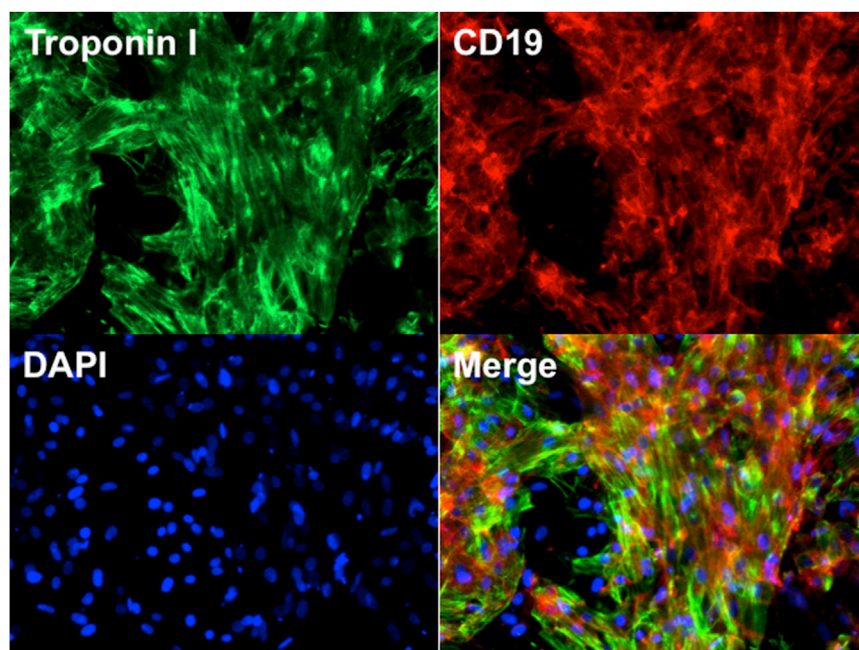

**Figure 3. Cardiac Differentiation from Genetically Modified RhiPSCs**

After 30 days, terminally differentiated cardiomyocytes derived from RhiPSC-h $\Delta$ CD19 co-expressed transgene (h $\Delta$ CD19) and a cardiac-specific marker, troponin I. Images were taken at 200 $\times$ . Representative images from the RhiPSC-h $\Delta$ CD19-7 clone are shown.

differentiation procedure, indicating no significant silencing of the transgenes (Figures 4B and 4C). Of note, for some h $\Delta$ CD19 clones, we measured lower mean fluorescence intensity of the marker during early stages of hepatic differentiation.

#### ECTODERMAL DIFFERENTIATION FROM EDITED RhiPSCs

To study transgene expression during directed differentiation toward ectoderm, the RhiPSC-h $\Delta$ CD19-7 line was differentiated toward neural lineages. At day 10, RhiPSC-derived neural stem cells, defined by positive PAX6 staining, co-expressed the transgene (h $\Delta$ CD19) (Figure S8).

#### Stable Expression of Transgene in Edited RhiPSC Clones following Teratoma Formation

To monitor long-term *in vivo* gene expression stability, undifferentiated edited RhiPSC clones were injected subcutaneously into the NOD-scid IL2r $\gamma$ null (NSG) mice and monitored for teratoma formation. All clones induced teratoma formation within 6–8 weeks (Figure 5A), a similar latency to parental clones. The majority of cells present in the teratomas expressed GFP or h $\Delta$ CD19, including mature cells derived from all three germ layers (Figures 5B–5D).

## DISCUSSION

The development of PSC-based systems for disease modeling and regenerative therapies of human diseases is promising. Gene targeting can be used to correct certain genetic mutations or to add therapeutic genes into safe harbor loci in PSC-derived therapeutic products. To monitor long-term cell survival, migration, and incorporation of these genetically modified PSCs into the recipient organs, engineered PSCs with proper reporter genes in large animal models are desirable. Traditionally, most genome editing and marker introduction have

been done using integrating vectors, such as lentiviruses, due to reliable efficiency and the need to have the marker or therapeutic gene passed on to all daughter cells.<sup>29</sup> However, random integration, particularly in stem cells, can be associated with either of two undesirable outcomes: ectopic activation of nearby proto-oncogenes or inactivation due to gene silencing.<sup>30,31</sup> In human cells, it is now feasible to achieve high gene-targeting efficiency with the CRISPR/Cas9 system. Recently, gene-modified cynomolgus monkeys were generated using CRISPR/Cas9, demonstrating that CRISPR/Cas9-mediated gene editing is also feasible in primates.<sup>21</sup> It was confirmed in another study where authors performed targeted genome editing in a single rhesus ESC line at the hypoxanthine-guanine phosphoribosyl transferase (HPRT) locus.<sup>20</sup>

This is the first study reporting successful CRISPR/Cas9-mediated gene addition at the AAVS1 safe harbor locus in NHP PSCs. Modified cells retained their pluripotent phenotype and showed no abnormal karyotype. Importantly, we demonstrated stable expression of our transgenes in undifferentiated and terminally differentiated RhiPSCs. However, for some h $\Delta$ CD19 clones, we measured heterogeneous transgene expression of the marker during intermediate stages of differentiation. Ordovás et al. recently reported that transgene expression inhibition at the AAVS1 site was observed in a lineage-dependent manner in human iPSCs due to DNA methylation and other unknown mechanisms.<sup>32</sup> We did not observe transgene silencing in GFP clones that showed robust GFP expression not only in undifferentiated status but also throughout the differentiation toward all three germ layers. This result suggests that the AAVS1 site can indeed support stable transgene expression in rhesus macaque. On the other hand, tissue- and transgene-specific post-transcriptional regulation may explain the heterogeneity of h $\Delta$ CD19 expression in some cell types.

In this study, we developed protocols for the efficient differentiation of RhiPSCs toward hematopoietic cells and hepatocytes, both under development in our rhesus models of *in vivo* tissue regeneration. These differentiation studies required some modifications from human differentiation approaches. Derivation of blood cells from rhesus PSCs has been found to be less efficient compared with humans using the identical protocols.<sup>25</sup> Rhesus bone marrow cells have been shown to form *in vitro* hematopoietic colonies inefficiently in response to

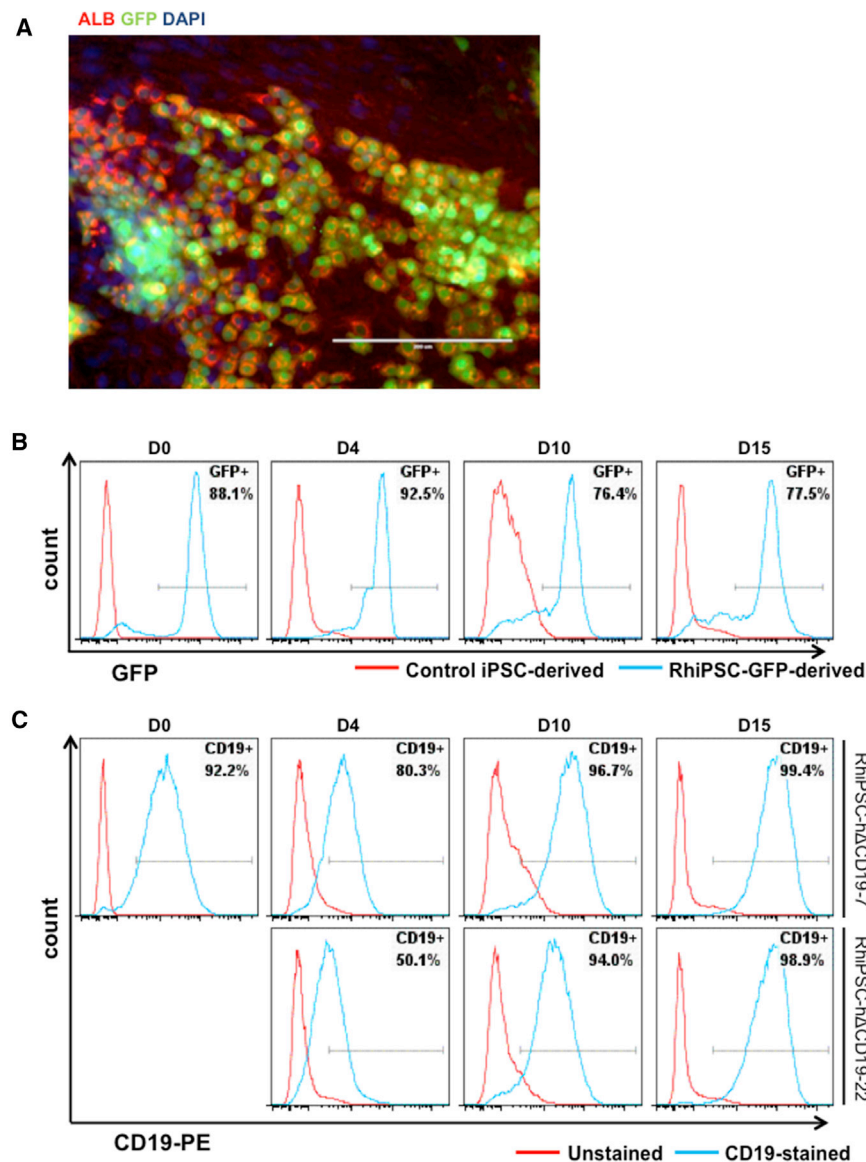

**Figure 4. Hepatic Differentiation from Genetically Modified RhiPSCs**

(A) Imaging demonstrates co-expression of GFP and ALB after 15 days of differentiation of an RhiPSC-GFP clone. Scale bar, 200  $\mu$ m. (B) GFP expression at days 0, 4, 10, and 15 of hepatic differentiation from an RhiPSC-GFP clone is shown. (C) h $\Delta$ CD19 expression at days 0, 4, 10, and 15 of hepatic differentiation from two RhiPSC-h $\Delta$ CD19 clones is shown.

CRISPR/Cas9 editing, due to low sequence similarity between the off-target indels and the intended target sites.<sup>37,38</sup> However, a recent study using deep sequencing to detect off-target editing of human AAVS1-T2 gRNA, the counterpart of our rhesus AAVS1 gRNA, found a significant number of indels at several endogenous loci in 293T cells and one site in a targeted human iPSC line.<sup>39</sup> In the current study, we identified potential off-target sites in the rhesus genome using the same algorithm,<sup>24</sup> and indeed we found indels at one or two sites in half the tested clones. Although we did not see any difference in reporter gene expression, differentiation efficiency, or teratoma formation between clones with or without off-target mutations, the long-term effects of these mutations on behavior of differentiated or undifferentiated iPSCs are unclear. These findings suggest that continued efforts to improve the specificity of CRISPR/Cas9 editing are desirable, for instance, optimization of gRNA choice to decrease off-target effects<sup>33</sup> or the use of alternative Cas9 enzymes.<sup>36,40</sup> It is also prudent to screen edited iPSC clones for off-target mutations before utilization.

human IL-3, with 50-fold lower potency of human in comparison to rhesus IL-3, likely due to several important changes in the IL-3 amino acid sequence between the two species.<sup>26</sup> We found that hematopoietic differentiation of rhesus PSCs can be greatly enhanced by replacing human with rhesus IL-3. Although NHPs are highly similar to humans, our data highlight the importance of careful optimization to increase differentiation efficiency.

While CRISPR/Cas9 shows great promise and is highly efficient, this approach also has been shown to result in off-target genomic changes.<sup>24,33–36</sup> Previous studies on a limited number of human CRISPR/Cas9-edited PSC clones reported a low incidence of off-target mutagenesis as detected by whole-genome sequencing, but they concluded that these changes were most likely not related to

in rhesus macaque, and targeted RhiPSC clones maintain stable transgene expression without significant silencing during in vitro and in vivo differentiation. The AAVS1-targeting strategy in combination with efficient differentiation protocols described in this manuscript will be useful to further develop autologous preclinical models for iPSC-based cell therapy. For example, a reporter gene inserted at the AAVS1 locus could be used as a marker to closely track the iPSC-derived cells in vivo and to assess efficacy of the transplanted cells. Additionally, the introduction of suicide genes at this site might permit on-demand ablation of transplanted cells in the case of an adverse event.<sup>41,42</sup> Further exploration of NHP homologs of other human safe harbor loci, such as ROSA26 and CLYBL,<sup>41,42</sup> will allow multiplexed transgene knockin and cell marking.

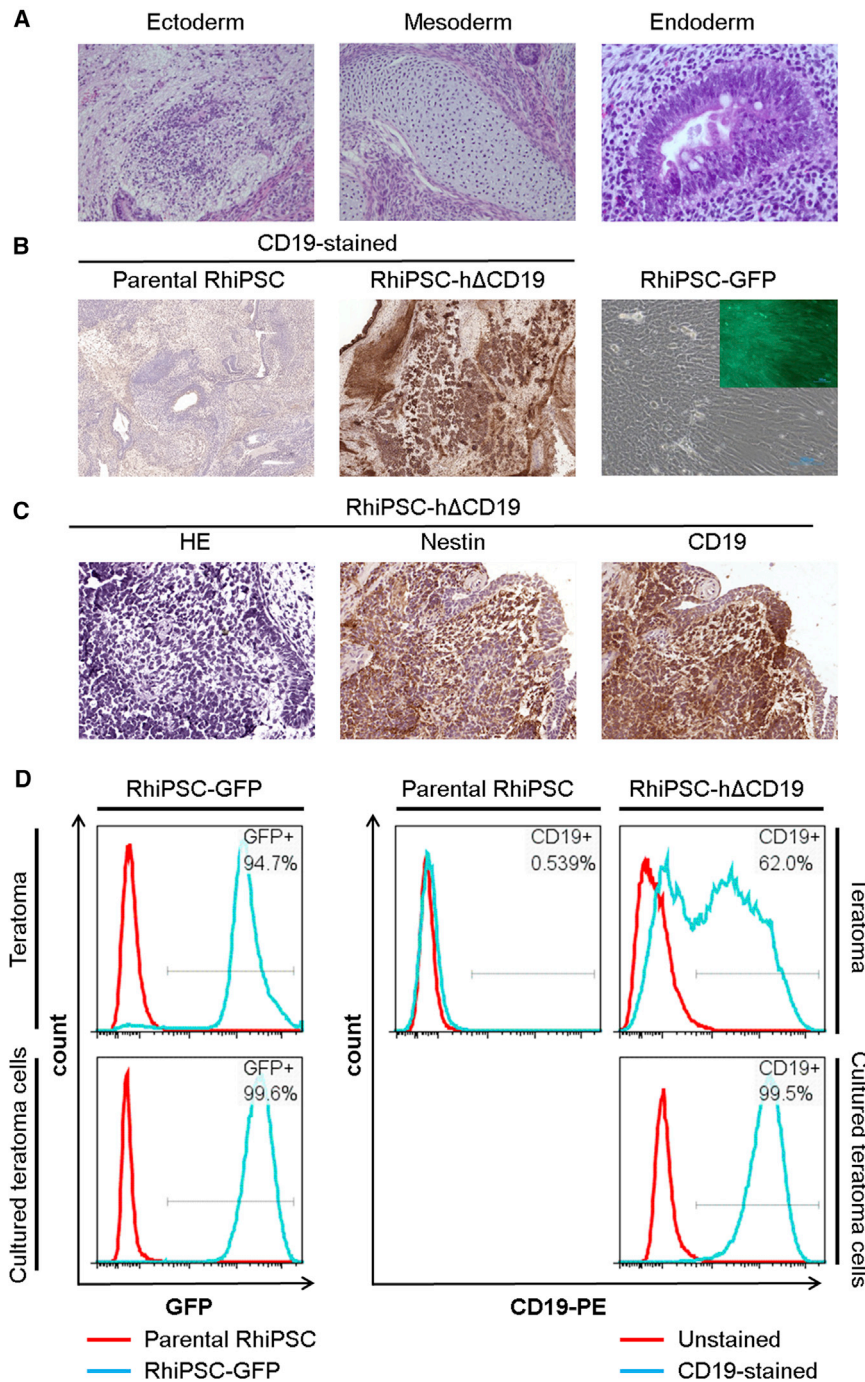

**Figure 5. Stable Transgene Expression in CRISPR/Cas9-Edited Clones after In Vivo Differentiation**

(A) Representative images of a teratoma formed by an edited RhiPSC-hΔCD19-7 clone. On H&E staining, all three germ-line tissue types were found in each injected animal, demonstrating pluripotency of edited clones. Ectoderm and mesoderm images were taken at 200 $\times$  and Endoderm was 400 $\times$ . (B) Representative images show transgene expression in teratoma tissues. Left panel: original RhiPSC-derived teratoma (20 $\times$ ); middle panel: RhiPSC-hΔCD19-7-derived teratoma (20 $\times$ ); right: primary cells isolated from teratoma tissue derived from an RhiPSC-GFP-21 clone (100 $\times$ ). (C) Transgene (hΔCD19) expression in the nestin-positive neuroectoderm (800 $\times$ ). Serial sections of a teratoma derived from RhiPSC-hΔCD19-7 were used for staining. (D) Teratoma cells were dispersed using collagenase II, dispase, and trypsin for flow cytometry analysis. Edited clones exhibited strong expression of GFP (left panel) or hΔCD19 (right panel) after in vivo teratoma formation (top row). Teratoma-derived single cells were further cultured in vitro for 1 week and re-analyzed by flow cytometry (bottom row).

#### Vector Construction and gRNA Screening

The all-in-one CRISPR/Cas9 plasmid PX458 (Addgene 48138), expressing *Streptococcus pyogenes* Cas9, EGFP, and U6 promoter-driven custom gRNA sequences, was modified to replace CBh with CAG promoter, which was known to drive strong and stable transgene expression in human PSCs,<sup>7,43</sup> and was deposited to Addgene (79144). A rhesus AAVS1 candidate gRNA sequence was identified, consisting of ggggccactaggacaggac (chromosome 19: 61115594–61115613), with a single base change from the corresponding human AAVS1 T2 gRNA sequence.<sup>17</sup> To access its cutting efficiency, T7E1 assay was performed. Briefly, rhesus FRhK-4 cell line was transfected with the candidate gRNA, and the AAVS1 region of the target cells was amplified by PCR using Platinum PCR SuperMix (Thermo Fisher Scientific, Life Technologies). Sequences for the primers we utilized are listed in Table S2. The PCR products were denatured (95 $^{\circ}$ C for 5 min) and reannealed (95 $^{\circ}$ C–85 $^{\circ}$ C, ramp rate of –2 $^{\circ}$ C/s followed by 85 $^{\circ}$ C–25 $^{\circ}$ C, ramp rate of –0.3 $^{\circ}$ C/s) to allow heteroduplex formation

between wild-type DNA and CRISPR/Cas9-edited DNA. T7E1 (2.5 U/reaction) was added to heteroduplex and incubated at 37 $^{\circ}$ C for 20 min. The resulting cleaved and full-length PCR products were visualized using 2.5% agarose gel. The donor plasmid used for transgene knockin was modified from the human AAVS1-CAG-copGFP vector<sup>41</sup> (Addgene 66577) by replacing the human AAVS1

## MATERIALS AND METHODS

### Animal Use

All animals used in this study were housed and handled in accordance with protocols approved by the Animal Care and Use Committee of the National Heart, Lung and Blood Institute (H-0294).

homology arms with rhesus homologous sequences. Rhesus AAVS1 5' and 3' homology arm sequences were amplified from RhiPSC genomic DNA, and they were cloned into the vector following digestion with NotI for the 5' homology arm and PmeI for the 3' homology arm using Gibson Assembly method. The rhesus AAVS1-CAG-copGFP donor plasmid was deposited at Addgene (73439). The copGFP marker gene was replaced with h $\Delta$ CD19<sup>6,23</sup> following digestion with BsrGI and MluI. The PCR primers used to produce each insert for Gibson Assembly are listed in [Table S2](#).

### RhiPSC Culture and EB Differentiation

RhiPSC lines derived from three independent rhesus macaques were used for gene targeting. ZG15-M11-10 and ZG32-3-4 lines were derived from bone marrow stromal cells and skin fibroblasts, respectively, using the Cre-excisableSTEMCCA vector.<sup>1</sup> ZH26-HS41 was derived from bone marrow CD34+ cells using the CytoTune-iPS 2.0 Sendai Reprogramming Kit (Thermo Fisher Scientific). RhiPSCs were cultured either on mouse embryonic fibroblasts (MEFs, GlobalStem) feeder or Matrigel (BD Biosciences) plates. RhiPSC medium was knockout (KO)/DMEM (Gibco, Life Technologies) supplemented with 20% knockout serum replacement (Life Technologies), 20 ng/ml human bFGF (PeproTech), 0.1 mM minimum essential medium (MEM) nonessential amino acids (Life Technologies), 1% penicillin-streptomycin-glutamine (Life Technologies), and 0.1 mM 2-mercaptoethanol (Sigma-Aldrich). For EB differentiation, day 3–4 undifferentiated RhiPSCs were harvested using a cell scraper and incubated in EB formation medium (RhiPSC medium without bFGF) overnight. The medium was replaced with fresh medium every 4–5 days.

### Gene Targeting, Colony Isolation, and Screening

One day before the transfection, puromycin-resistant MEFs (puro-MEF, GlobalStem) were plated. On day 0, nucleofection of RhiPSCs was performed with the 4D-Nucleofector System (Lonza), and  $1 \times 10^6$  cells were plated onto the puro-MEF plates in RhiPSC medium supplemented with 10  $\mu$ M Rock inhibitor (Stemgent). Then 2 days following transfection, 0.5  $\mu$ g/ml puromycin (Sigma-Aldrich) was added for 5 days, and the medium was changed daily until ESC-like colonies appeared. To select h $\Delta$ CD19-positive clones, cells were live-stained with an anti-human CD19-PE (BD Biosciences). GFP- or h $\Delta$ CD19-positive colonies were mechanically transferred onto new MEFs and expanded for further analyses. PCR and Southern blot analysis were performed as previously described<sup>12,44</sup> in order to screen for targeted integration and exclude clones with random integration. Sequences for the primers we utilized are listed in [Table S2](#). An AAVS1 5' homology arm probe was used for Southern blot.

### Teratoma Formation

Teratoma formation by RhiPSCs was assessed as previously described.<sup>1</sup> Frozen tissue sections were stained with anti-human CD19 (1:800, BD Biosciences) and Nestin (1:400, Neuromics) antibodies.

### Off-Target Analyses

To perform off-target analyses, we developed an in-house Python script that calculated the scores for each off-target site, based on the previously published algorithm<sup>24</sup> as well as the updated formula posted by the same group (<http://crispr.mit.edu/about>). The reference genome was downloaded from the Ensembl website (<http://www.ensembl.org>, release 77), and the unmasked version was used. The script searches for all possible guide sequences in a given region, and it lists off-target sites associated with guide sequences up to four mismatches. We validated our script by comparing results with the online tool for a test region within the human genome. Using this pipeline, 403 candidate off-target sites in the rhesus genome were computationally identified. The top ten potential off-target loci were amplified using the primer sets listed in [Table S2](#). The Platinum PCR SuperMix High Fidelity was used as directed, with optimization of annealing temperature to 61°C for amplification of OT10. The purified PCR products were Sanger-sequenced, and each sequence chromatogram was analyzed with the online Tracking of In/dels by Decomposition (TIDE) software (<https://tide.nki.nl>). To confirm a precise sequence of indels in some clones, subcloning of PCR fragments was performed using the Zero Blunt TOPO cloning kit (Invitrogen).

### Hematopoietic Differentiation

Undifferentiated iPSCs were harvested with Accutase (EMD Millipore), and they were either plated on Matrigel for monolayer differentiation or incubated in ultra-low-attachment 96-well plates (Corning) to generate EBs, in STEMdiff APEL Medium (STEMCELL Technologies) supplemented with 10  $\mu$ M Rock inhibitor. After 1–2 days, medium was replaced with STEMdiff APEL Medium with 30 ng/mL VEGF (R&D Systems), 30 ng/mL BMP-4 (R&D Systems), 40 ng/mL SCF (Amgen), and 50 ng/mL Activin A (R&D Systems). On day 4, this medium was replaced with hematopoietic differentiation medium: STEMdiff APEL Medium supplemented with 300 ng/mL SCF, 300 ng/mL Flt-3 ligand (Miltenyi Biotec), 10 ng/mL IL-3 (human IL-3 from R&D Systems, rhesus IL-3 from ProSpec), 10 ng/mL IL-6 (R&D Systems), 50 ng/mL G-CSF (filgrastim, Amgen), and 25 ng/mL BMP-4. Medium was replaced with fresh hematopoietic differentiation medium every 3–4 days. After hematopoietic differentiation, cells were dissociated into single cells and analyzed by flow cytometry or plated in CFU assays. For flow cytometry, cells were stained for viability using LIVE/DEAD Fixable Violet Dead Cell Stain Kit (ViViD, Invitrogen), along with CD34 and CD45 (BD Biosciences). Data were acquired on a LSRII flow cytometer (BD Biosciences) and analyzed using FlowJo software (Tree Star). For CFU assays, 50,000 EB-derived cells were plated in MethoCult H4435 medium (STEMCELL Technologies) supplemented with 10 ng/mL rhesus IL-3 and incubated for 12–14 days.

### Cardiac Differentiation

Cardiomyocytes were differentiated from RhiPSCs by treating with BMP-4, Activin A, and bFGF followed by the Wnt inhibitor IWP-2. At day 30 of differentiation, cells were stained with anti-human CD19-PE and anti-cardiac Troponin I (1:100, Santa Cruz Biotechnology) antibodies.



### Hepatic Differentiation

RhiPSCs were first differentiated to SOX17- and FOXA2-positive definitive endoderm in STEMdiff Definitive Endoderm medium (STEMCELL Technologies) in 5% O<sub>2</sub>. After 4 days, cells were transferred to a normoxic incubator and further differentiated to hepatoblasts in medium with 100 ng/ml hepatocyte growth factor and 1% DMSO for 8 days, as previously described.<sup>27,28</sup> Finally, cells were pushed toward hepatocyte-like cells with the addition of 10<sup>-7</sup> M dexamethasone for 3 additional days. At each time point, cells were analyzed by Taqman RT-qPCR and immunostaining as previously described.<sup>27</sup>

### Neural Induction from RhiPSCs

RhiPSCs were differentiated toward neural stem cells using PSC Neural Induction Medium (Gibco). After 7 days of differentiation, cells were passaged according to the manufacturer's protocol and cultured for 3 more days. Cells were stained with anti-human CD19-PE and anti-PAX6 (1:100, BioLegend) antibodies.

### Statistical Analysis

Prism 6 software (GraphPad) was used in statistical analysis and graph creation. Student's t tests were utilized to analyze flow cytometry and CFU data; *p* < 0.05 was considered statistically significant. Data are presented as mean ± SEM in all figure panels in which error bars are shown.

### SUPPLEMENTAL INFORMATION

Supplemental Information includes eight figures and two tables and can be found with this article online at <http://dx.doi.org/10.1016/j.ymthe.2016.10.007>.

### AUTHOR CONTRIBUTIONS

S.H., J.Z., and C.E.D. conceived the study and designed the work. S.H., R.Y., K.C., M.A.F.C., M.J., Y.L., H.L., A.C., A.A.A., and M.P. collected and analyzed data. M.B., R.K.M., C.L.S., H.L.M., T.J.L., I.T., X.W., S.P., T.W., J.Z., and C.E.D. performed data analysis and interpretation. S.H., R.Y., T.W., and C.E.D. wrote the manuscript.

### ACKNOWLEDGMENTS

This research was supported by funding from the Division of Intramural Research at the National Heart, Lung and Blood Institute (NHLBI) at the NIH. We thank Gianpietro Dotti for sharing the pCDH-iCasp9-2A-h ΔCD19 lentiviral vector. We thank the NHLBI Pathology core for tissue processing and Building 50 staff for provision of excellent animal care. We also thank Shiqin Judy Yu for assisting with the iPSC culture, Macallister Harris for his support during the Southern blot analysis, and Alec Nickolls for feedback on neural stem cell staining.

### REFERENCES

- Hong, S.G., Winkler, T., Wu, C., Guo, V., Pittaluga, S., Nicolae, A., Donahue, R.E., Metzger, M.E., Price, S.D., Uchida, N., et al. (2014). Path to the clinic: assessment of iPSC-based cell therapies in vivo in a nonhuman primate model. *Cell Rep.* 7, 1298–1309.
- Emborg, M.E., Liu, Y., Xi, J., Zhang, X., Yin, Y., Lu, J., Joers, V., Swanson, C., Holden, J.E., and Zhang, S.C. (2013). Induced pluripotent stem cell-derived neural cells survive and mature in the nonhuman primate brain. *Cell Rep.* 3, 646–650.
- Hallett, P.J., Deleidi, M., Astradsson, A., Smith, G.A., Cooper, O., Osborn, T.M., Sundberg, M., Moore, M.A., Perez-Torres, E., Brownell, A.L., et al. (2015). Successful function of autologous iPSC-derived dopamine neurons following transplantation in a non-human primate model of Parkinson's disease. *Cell Stem Cell* 16, 269–274.
- Hong, S.G., Dunbar, C.E., and Winkler, T. (2013). Assessing the risks of genotoxicity in the therapeutic development of induced pluripotent stem cells. *Mol. Ther.* 21, 272–281.
- Smith, J.R., Maguire, S., Davis, L.A., Alexander, M., Yang, F., Chandran, S., French-Constant, C., and Pedersen, R.A. (2008). Robust, persistent transgene expression in human embryonic stem cells is achieved with AAVS1-targeted integration. *Stem Cells* 26, 496–504.
- Wu, C., Hong, S.G., Winkler, T., Spencer, D.M., Jares, A., Ichwan, B., Nicolae, A., Guo, V., Larochelle, A., and Dunbar, C.E. (2014). Development of an inducible caspase-9 safety switch for pluripotent stem cell-based therapies. *Mol. Ther. Methods Clin. Dev.* 1, 14053.
- Zou, J., Sweeney, C.L., Chou, B.K., Choi, U., Pan, J., Wang, H., Dowey, S.N., Cheng, L., and Malech, H.L. (2011). Oxidase-deficient neutrophils from X-linked chronic granulomatous disease iPS cells: functional correction by zinc finger nuclease-mediated safe harbor targeting. *Blood* 117, 5561–5572.
- Sadelain, M., Papapetrou, E.P., and Bushman, F.D. (2011). Safe harbors for the integration of new DNA in the human genome. *Nat. Rev. Cancer* 12, 51–58.
- Papapetrou, E.P., Lee, G., Malani, N., Setty, M., Riviere, I., Tirunagari, L.M., Kadota, K., Roth, S.L., Giardina, P., Viale, A., et al. (2011). Genomic safe harbors permit high β-globin transgene expression in thalassemia induced pluripotent stem cells. *Nat. Biotechnol.* 29, 73–78.
- Papapetrou, E.P., and Schambach, A. (2016). Gene insertion into genomic safe harbors for human gene therapy. *Mol. Ther.* 24, 678–684.
- van Rensburg, R., Beyer, I., Yao, X.Y., Wang, H., Denisenko, O., Li, Z.Y., Russell, D.W., Miller, D.G., Gregory, P., Holmes, M., et al. (2013). Chromatin structure of two genomic sites for targeted transgene integration in induced pluripotent stem cells and hematopoietic stem cells. *Gene Ther.* 20, 201–214.
- Luo, Y., Liu, C., Cerbini, T., San, H., Lin, Y., Chen, G., Rao, M.S., and Zou, J. (2014). Stable enhanced green fluorescent protein expression after differentiation and transplantation of reporter human induced pluripotent stem cells generated by AAVS1 transcription activator-like effector nucleases. *Stem Cells Transl. Med.* 3, 821–835.
- Sekine, K., Takebe, T., and Taniguchi, H. (2014). Fluorescent labeling and visualization of human induced pluripotent stem cells with the use of transcription activator-like effector nucleases. *Transplant. Proc.* 46, 1205–1207.
- Oceguera-Yanez, F., Kim, S.I., Matsumoto, T., Tan, G.W., Xiang, L., Hatani, T., Kondo, T., Ikeya, M., Yoshida, Y., Inoue, H., and Woljten, K. (2016). Engineering the AAVS1 locus for consistent and scalable transgene expression in human iPSCs and their differentiated derivatives. *Methods* 101, 43–55.
- Zhang, P.W., Haidet-Phillips, A.M., Pham, J.T., Lee, Y., Huo, Y., Tienari, P.J., Maragakis, N.J., Sattler, R., and Rothstein, J.D. (2016). Generation of GFAP:GFP astrocyte reporter lines from human adult fibroblast-derived iPSC cells using zinc-finger nuclease technology. *Glia* 64, 63–75.
- Cong, L., Ran, F.A., Cox, D., Lin, S., Barretto, R., Habib, N., Hsu, P.D., Wu, X., Jiang, W., Marraffini, L.A., and Zhang, F. (2013). Multiplex genome engineering using CRISPR/Cas systems. *Science* 339, 819–823.
- Mali, P., Yang, L., Esvelt, K.M., Aach, J., Guell, M., DiCarlo, J.E., Norville, J.E., and Church, G.M. (2013). RNA-guided human genome engineering via Cas9. *Science* 339, 823–826.
- Maeder, M.L., and Gersbach, C.A. (2016). Genome-editing technologies for gene and cell therapy. *Mol. Ther.* 24, 430–446.
- Chen, Y., Zheng, Y., Kang, Y., Yang, W., Niu, Y., Guo, X., Tu, Z., Si, C., Wang, H., Xing, R., et al. (2015). Functional disruption of the dystrophin gene in rhesus monkey using CRISPR/Cas9. *Hum. Mol. Genet.* 24, 3764–3774.

20. Zhu, S., Rong, Z., Lu, X., Xu, Y., and Fu, X. (2015). Gene targeting through homologous recombination in monkey embryonic stem cells using CRISPR/Cas9 system. *Stem Cells Dev.* 24, 1147–1149.
21. Niu, Y., Shen, B., Cui, Y., Chen, Y., Wang, J., Wang, L., Kang, Y., Zhao, X., Si, W., Li, W., et al. (2014). Generation of gene-modified cynomolgus monkey via Cas9/RNA-mediated gene targeting in one-cell embryos. *Cell* 156, 836–843.
22. Barese, C.N., Felizardo, T.C., Sellers, S.E., Keyvanfar, K., Di Stasi, A., Metzger, M.E., Krouse, A.E., Donahue, R.E., Spencer, D.M., and Dunbar, C.E. (2015). Regulated apoptosis of genetically modified hematopoietic stem and progenitor cells via an inducible caspase-9 suicide gene in rhesus macaques. *Stem Cells* 33, 91–100.
23. Di Stasi, A., Tey, S.K., Dotti, G., Fujita, Y., Kennedy-Nasser, A., Martinez, C., Straathof, K., Liu, E., Durett, A.G., Grilley, B., et al. (2011). Inducible apoptosis as a safety switch for adoptive cell therapy. *N. Engl. J. Med.* 365, 1673–1683.
24. Hsu, P.D., Scott, D.A., Weinstein, J.A., Ran, F.A., Konermann, S., Agarwala, V., Li, Y., Fine, E.J., Wu, X., Shalem, O., et al. (2013). DNA targeting specificity of RNA-guided Cas9 nucleases. *Nat. Biotechnol.* 31, 827–832.
25. Rajesh, D., Chinnasamy, N., Mitalipov, S.M., Wolf, D.P., Slukvin, I., Thomson, J.A., and Shaaban, A.F. (2007). Differential requirements for hematopoietic commitment between human and rhesus embryonic stem cells. *Stem Cells* 25, 490–499.
26. Burger, H., van Leen, R.W., Dorssers, L.C., Persoon, N.L., Lemson, P.J., and Wagemaker, G. (1990). Species specificity of human interleukin-3 demonstrated by cloning and expression of the homologous rhesus monkey (*Macaca mulatta*) gene. *Blood* 76, 2229–2234.
27. Carpentier, A., Tesfaye, A., Chu, V., Nimgaonkar, I., Zhang, F., Lee, S.B., Thorgeirsson, S.S., Feinstone, S.M., and Liang, T.J. (2014). Engrafted human stem cell-derived hepatocytes establish an infectious HCV murine model. *J. Clin. Invest.* 124, 4953–4964.
28. Carpentier, A., Nimgaonkar, I., Chu, V., Xia, Y., Hu, Z., and Liang, T.J. (2016). Hepatic differentiation of human pluripotent stem cells in miniaturized format suitable for high-throughput screen. *Stem Cell Res. (Amst.)* 16, 640–650.
29. Wianny, F., Bernat, A., Huisoud, C., Marcy, G., Markossian, S., Cortay, V., Giroud, P., Leviel, V., Kennedy, H., Savatier, P., and Dehay, C. (2008). Derivation and cloning of a novel rhesus embryonic stem cell line stably expressing tau-green fluorescent protein. *Stem Cells* 26, 1444–1453.
30. Rivière, I., Dunbar, C.E., and Sadelain, M. (2012). Hematopoietic stem cell engineering at a crossroads. *Blood* 119, 1107–1116.
31. Schlesinger, S., and Goff, S.P. (2015). Retroviral transcriptional regulation and embryonic stem cells: war and peace. *Mol. Cell. Biol.* 35, 770–777.
32. Ordovás, L., Boon, R., Pistoni, M., Chen, Y., Wolfs, E., Guo, W., Sambathkumar, R., Bobis-Wozowicz, S., Helsen, N., Vanhove, J., et al. (2015). Efficient recombinase-mediated cassette exchange in hPSCs to study the hepatocyte lineage reveals AAVS1 locus-mediated transgene inhibition. *Stem Cell Reports* 5, 918–931.
33. Fu, Y., Foden, J.A., Khayter, C., Maeder, M.L., Reyon, D., Joung, J.K., and Sander, J.D. (2013). High-frequency off-target mutagenesis induced by CRISPR-Cas nucleases in human cells. *Nat. Biotechnol.* 31, 822–826.
34. Cradick, T.J., Fine, E.J., Antico, C.J., and Bao, G. (2013). CRISPR/Cas9 systems targeting  $\beta$ -globin and CCR5 genes have substantial off-target activity. *Nucleic Acids Res.* 41, 9584–9592.
35. Cho, S.W., Kim, S., Kim, Y., Kweon, J., Kim, H.S., Bae, S., and Kim, J.S. (2014). Analysis of off-target effects of CRISPR/Cas-derived RNA-guided endonucleases and nickases. *Genome Res.* 24, 132–141.
36. Slaymaker, I.M., Gao, L., Zetsche, B., Scott, D.A., Yan, W.X., and Zhang, F. (2016). Rationally engineered Cas9 nucleases with improved specificity. *Science* 351, 84–88.
37. Smith, C., Gore, A., Yan, W., Abalde-Atristain, L., Li, Z., He, C., Wang, Y., Brodsky, R.A., Zhang, K., Cheng, L., and Ye, Z. (2014). Whole-genome sequencing analysis reveals high specificity of CRISPR/Cas9 and TALEN-based genome editing in human iPSCs. *Cell Stem Cell* 15, 12–13.
38. Veres, A., Gosis, B.S., Ding, Q., Collins, R., Ragavendran, A., Brand, H., Erdin, S., Cowan, C.A., Talkowski, M.E., and Musunuru, K. (2014). Low incidence of off-target mutations in individual CRISPR-Cas9 and TALEN targeted human stem cell clones detected by whole-genome sequencing. *Cell Stem Cell* 15, 27–30.
39. Smith, C., Abalde-Atristain, L., He, C., Brodsky, B.R., Braunstein, E.M., Chaudhari, P., Jang, Y.Y., Cheng, L., and Ye, Z. (2015). Efficient and allele-specific genome editing of disease loci in human iPSCs. *Mol. Ther.* 23, 570–577.
40. Kleinstiver, B.P., Pattanayak, V., Prew, M.S., Tsai, S.Q., Nguyen, N.T., Zheng, Z., and Joung, J.K. (2016). High-fidelity CRISPR-Cas9 nucleases with no detectable genome-wide off-target effects. *Nature* 529, 490–495.
41. Cerbini, T., Funahashi, R., Luo, Y., Liu, C., Park, K., Rao, M., Malik, N., and Zou, J. (2015). Transcription activator-like effector nuclease (TALEN)-mediated CLYBL targeting enables enhanced transgene expression and one-step generation of dual reporter human induced pluripotent stem cell (iPSC) and neural stem cell (NSC) lines. *PLoS ONE* 10, e0116032.
42. Irion, S., Luche, H., Gadue, P., Fehling, H.J., Kennedy, M., and Keller, G. (2007). Identification and targeting of the ROSA26 locus in human embryonic stem cells. *Nat. Biotechnol.* 25, 1477–1482.
43. Ran, F.A., Hsu, P.D., Wright, J., Agarwala, V., Scott, D.A., and Zhang, F. (2013). Genome engineering using the CRISPR-Cas9 system. *Nat. Protoc.* 8, 2281–2308.
44. Winkler, T., Hong, S.G., Decker, J.E., Morgan, M.J., Wu, C., Hughes, W.M., 5th, Yang, Y., Wangsa, D., Padilla-Nash, H.M., Ried, T., et al. (2013). Defective telomere elongation and hematopoiesis from telomerase-mutant aplastic anemia iPSCs. *J. Clin. Invest.* 123, 1952–1963.

## **Supplemental Information**

### **Rhesus iPSC Safe Harbor Gene-Editing Platform for Stable Expression of Transgenes in Differentiated Cells of All Germ Layers**

**So Gun Hong, Ravi Chandra Yada, Kyujoo Choi, Arnaud Carpentier, T. Jake Liang, Randall K. Merling, Colin L. Sweeney, Harry L. Malech, Moonjung Jung, Marcus A.F. Corat, Aisha A. AlJanahi, Yongshun Lin, Huimin Liu, Ilker Tunc, Xujing Wang, Maryknoll Palisoc, Stefania Pittaluga, Manfred Boehm, Thomas Winkler, Jizhong Zou, and Cynthia E. Dunbar**

## SUPPLEMENTARY MATERIAL

### a Human *PPP1R12C*

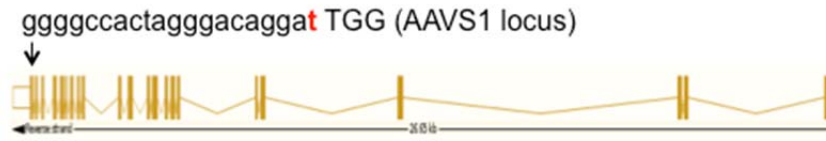

### Rhesus *PPP1R12C*

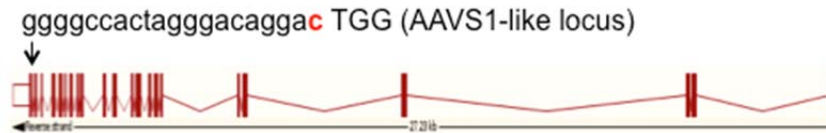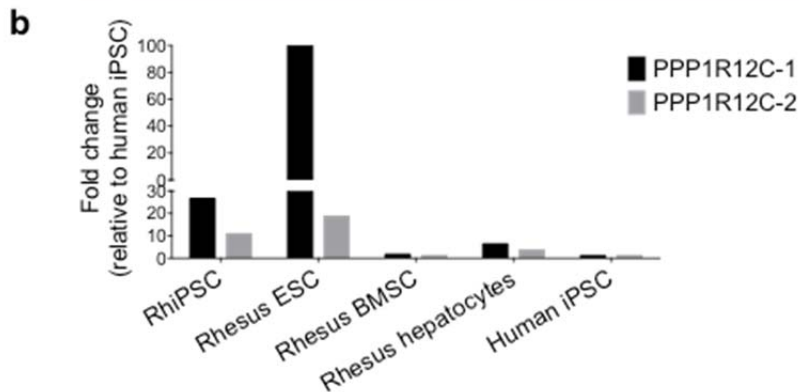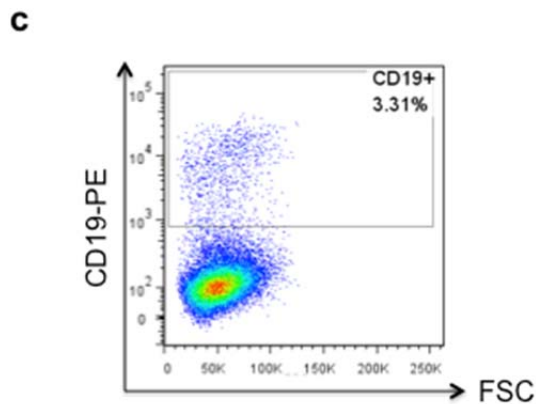

### Figure S1 CRISPR/Cas9-mediated targeting of rhesus macaque AAVS1

(a) Comparison of structure of the *PPP1R12C* gene and the AAVS1 site in the human and rhesus macaque genome. Small letters represent gRNA target sequences while capital letters indicate PAM sequences. Note that the last base pair of the gRNA target sequence is different between human and rhesus. (b) The rhesus *PPP1R12C* gene is expressed in various rhesus macaque cell types, including induced pluripotent stem cells (iPSC), embryonic stem cells (ESC), bone-marrow stromal cells (BMSC), and primary hepatocytes. Two different primer sets (PPP1R12C-1 and -2) were used to confirm the pattern of gene expression. (c) CD19 expression in 293T cells after transfection of the hΔCD19 donor plasmid

|                         |                              |               |
|-------------------------|------------------------------|---------------|
| Reference seq           | CCGTGGGGCCACTAGGGACAGGACTGGT | GAC           |
| <b>ZG15 M11-10</b>      | CCGTGGGGCCACTAGGGACAGGACTGGT | GAC           |
| ZG15 M11-10-CD19-7      | CCGTGGGGCCACTAGGG            | -----AC       |
| ZG15 M11-10-CD19-22     | CCGTGGGGCCACTAGGGACAG        | -ACTGGT       |
| ZG15 M11-10-GFP-5       | CCGTGGGGCCACTAGGGACAG        | -ACTGGT       |
| ZG15 M11-10-GFP-11      | CCGTGGGGCCACTAGG             | -----TGAC     |
| ZG15 M11-10-GFP-20      | CCGTGGGGCCACTAGGG            | -----G---TGGT |
| ZG15 M11-10-GFP-21      | CCGTGGGGCCACTAGGGACAG        | -A-----TGAC   |
| <b>ZG32-3-4</b>         | CCGTGGGGCCACTAGGGACAGGACTGGT | GAC           |
| <b>ZG32-3-4-CD19-11</b> | CCGTGGGGCCACTAGGGACAGGACTGGT | GAC           |
| ZG32-3-4-GFP-10         | CCGTGGGGCCACTAGGG            | -----TGAC     |
| <b>ZH26-HS41</b>        | CCGTGGGGCCACTAGGGACAGGACTGGT | GAC           |
| ZH26-HS41-CD19-3        | CCGTGGGGCCACTAGGGACAG        | -ACTGGT       |

**Figure S2 On-target mutations in non-targeted alleles**

The AAVS1 locus in a non-targeted allele of CRISPR/Cas9-edited clones was sequenced. Parental RhiPSC clones were highlighted in bold. The clone with intact non-targeted allele without any mutation is highlighted in red. The boxes indicate the 20 bp gRNA-targeting sequence and the 3 bp protospacer-associated motif or PAM (Chromosome 19:61115591-61115613). Red highlight indicates mismatches compared to the rhesus macaque reference sequence.

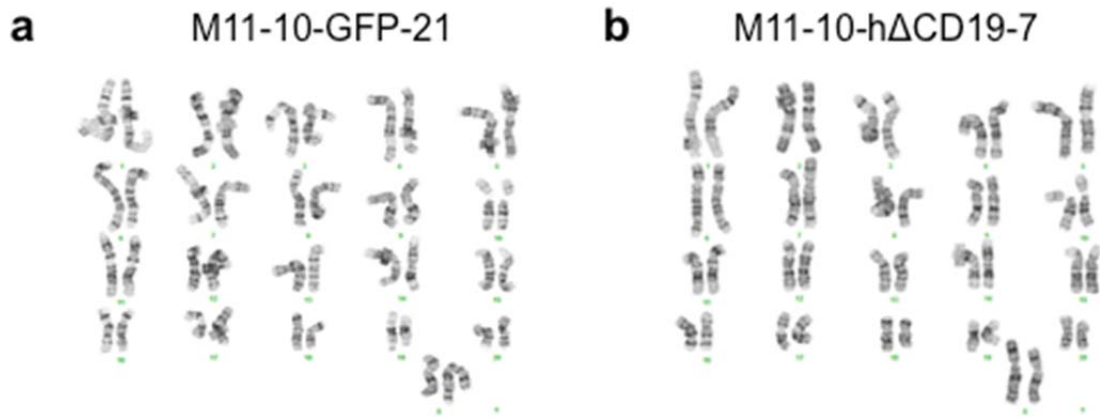

**Figure S3** CRISPR/Cas9-edited clones maintained normal karyotype, representative examples are shown.

**a**

| Animal ID | RhiPSC clone        | Predicted off-target site |   |   |   |     |   |   |      |   |    |
|-----------|---------------------|---------------------------|---|---|---|-----|---|---|------|---|----|
|           |                     | 1                         | 2 | 3 | 4 | 5   | 6 | 7 | 8    | 9 | 10 |
| ZG15      | ZG15-M11-10-CD19-7  |                           |   |   |   |     |   |   |      |   |    |
|           | ZG15-M11-10-CD19-22 |                           |   |   |   |     |   |   | -19  |   |    |
|           | ZG15-M11-10-GFP-5   |                           |   |   |   | *   |   |   | +1   |   |    |
|           | ZG15-M11-10-GFP-11  |                           |   |   |   |     |   |   |      |   |    |
|           | ZG15-M11-10-GFP-20  |                           |   |   |   |     |   |   |      |   |    |
|           | ZG15-M11-10-GFP-21  |                           |   |   |   |     |   |   |      |   |    |
| ZG32      | ZG32-3-4-CD19-11    |                           |   |   |   | -48 |   |   | -5   |   |    |
|           | ZG32-3-4-GFP-10     |                           |   |   |   |     |   |   | +212 |   |    |
| ZH26      | ZH26-HS41-CD19-3    |                           |   |   |   | -9  |   |   | **   |   |    |
|           | ZH26-HS41-CD19-7    |                           |   |   |   |     |   |   |      |   |    |

\*-38, -162; \*\*-5, -13, -23

**b**

**ZH26-HS41-CD19-3**

|     |                                                               |  |    |  |      |
|-----|---------------------------------------------------------------|--|----|--|------|
| OT5 | TCCTTCACCAGGTTAGGGGACCATGAGGGACAGGACTGGCTCTCAGCCTAAGGAGCACTCA |  | wt |  |      |
|     | TCCTTCACCAGGTTAGGGGACCATGAGGGACAGGACTGGCTCTCAGCCTAAGGAGCACTCA |  |    |  |      |
|     | TCCTTCACCAGGTTAGGGGACCATGAGGGACAGGACTGGCTCTCAGCCTAAGGAGCACTCA |  |    |  |      |
|     | TCCTTCACCAGGTTAGGGGACCATGAGGGACAGGACTGGCTCTCAGCCTAAGGAGCACTCA |  |    |  |      |
|     | TCCTTCACCAGGTTAGGGGACCATG-----ACTGGCTCTCAGCCTAAGGAGCACTCA     |  |    |  | -9bp |
|     | TCCTTCACCAGGTTAGGGGACCATG-----ACTGGCTCTCAGCCTAAGGAGCACTCA     |  |    |  |      |

**ZG15-M11-10-CD19-22**

|     |                                                                    |  |    |  |       |
|-----|--------------------------------------------------------------------|--|----|--|-------|
| OT8 | GCATAGAGGGCCCTGGGGAGCACTAAGGACAGGACCGGGGGACCCTCCAGTCTGAGGTAGAACTCT |  | wt |  |       |
|     | GCATAGAGGGCCCTGGGGAGCACTAAGGACAGGACCGGGGGACCCTCCAGTCTGAGGTAGAACTCT |  |    |  |       |
|     | GCATAGAGGGCCCTGGGGAGCACTAAGGACAGGACCGGGGGACCCTCCAGTCTGAGGTAGAACTCT |  |    |  |       |
|     | GCATAGAGGGCCCTGGGGAGCACTAAGGACAGGACCGGGGGACCCTCCAGTCTGAGGTAGAACTCT |  |    |  |       |
|     | GCATAGAGGGCCCTGGGA-----GGGACCCTCCAGTCTGAGGTAGAACTCT                |  |    |  | -19bp |
|     | GCATAGAGGGCCCTGGGA-----GGGACCCTCCAGTCTGAGGTAGAACTCT                |  |    |  |       |

**Figure S4** Off-target analysis of CRISPR/Cas9 system

(a) Summary of off-target analysis in six RhiPSC clones. The top 10 potential off-target sites were sequenced. Red: Insertions/deletions (indels) were found at the off-target site with the respective size of indel(s) denoted. White: No mutation was found at the off-target site. (b) After off-target PCR, TOPO cloning was performed to identify exact sequence of the indels. Representative sequencing results of off-target sites five and eight are from clones ZH26-HS41-CD19-3 and ZG15-M11-10-CD19-22, respectively. The boxes indicate the 20 bp off-target sequence and the 3 bp PAM sequence.

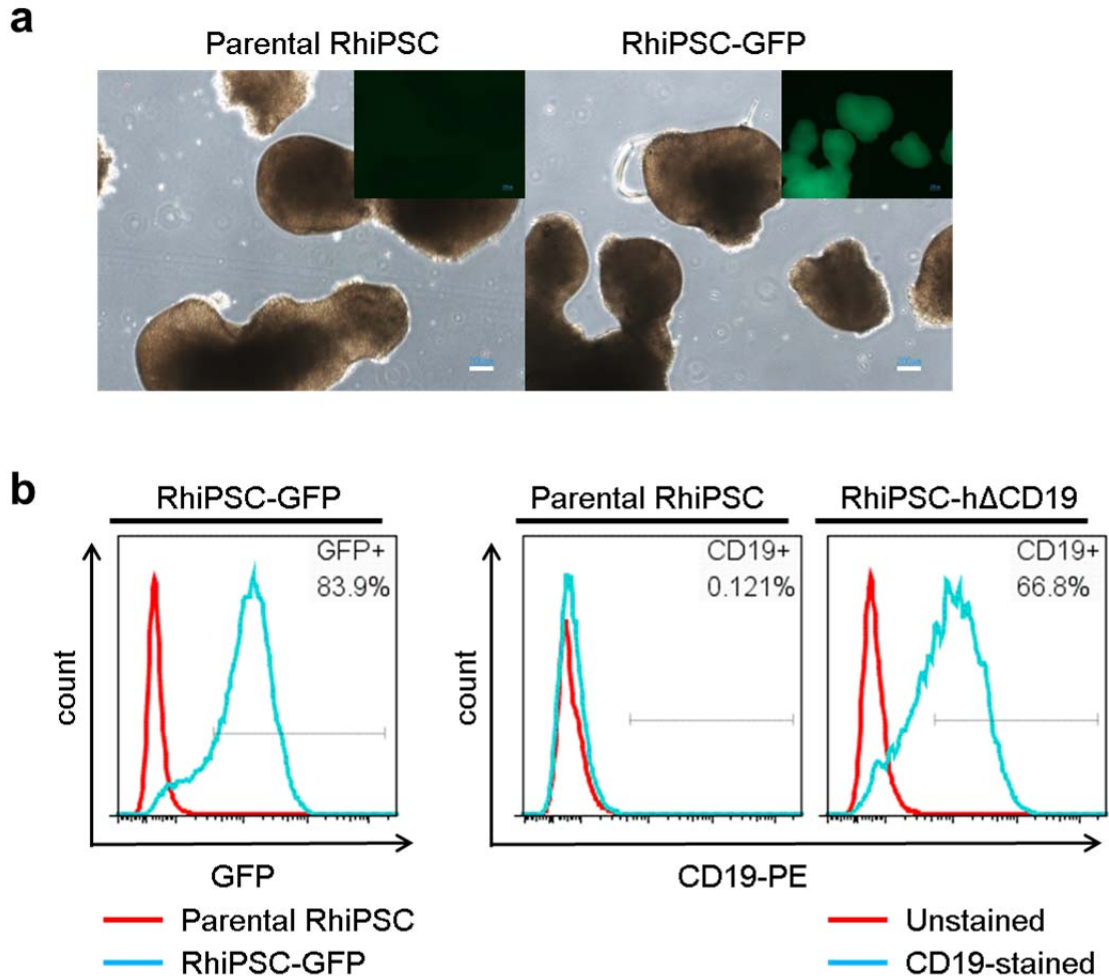

**Figure S5 Stable transgene expression in CRISPR/Cas9-edited clones after *in vitro* spontaneous differentiation**

(a) Representative images of embryoid bodies (EBs) derived from parental RhiPSC (left) and edited clones (right) on 15 days of differentiation. Scale bars, 200  $\mu$ m (b) Flow analysis confirmed stable transgene expression in EBs from both RhiPSC-GFP (left) and RhiPSC-h $\Delta$ CD19 (right) clones.



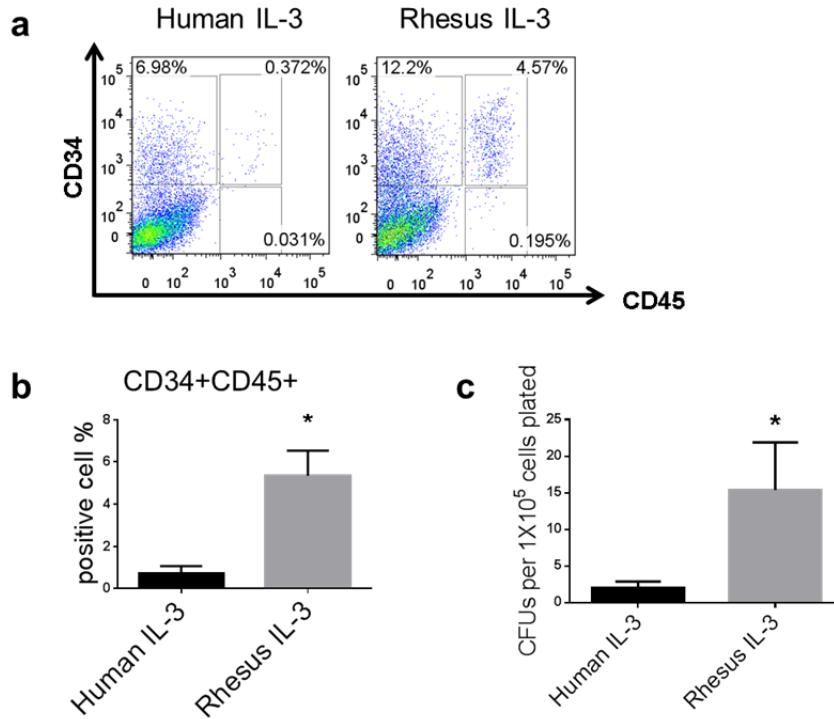

**Figure S6 Effect of rhesus IL-3 versus human IL-3 on RhiPSC hematopoietic differentiation**

(a) CD34+CD45+ cells were detected at the end of differentiation by flow cytometry.

Representative flow cytometry plot comparing hematopoietic differentiation from RhiPSC with human versus rhesus IL-3 at a concentration of 10 ng/ml is shown. (b) A summary graph of flow cytometry analysis from 3 independent experiments. (c) Number of CFU colonies from

CD34+CD45+ cells differentiated using either human or rhesus IL-3. In all bar graphs, the final result given for a sample represents the mean and standard error of the mean. Student's t-tests, \* $P < 0.05$ ,  $n=3$

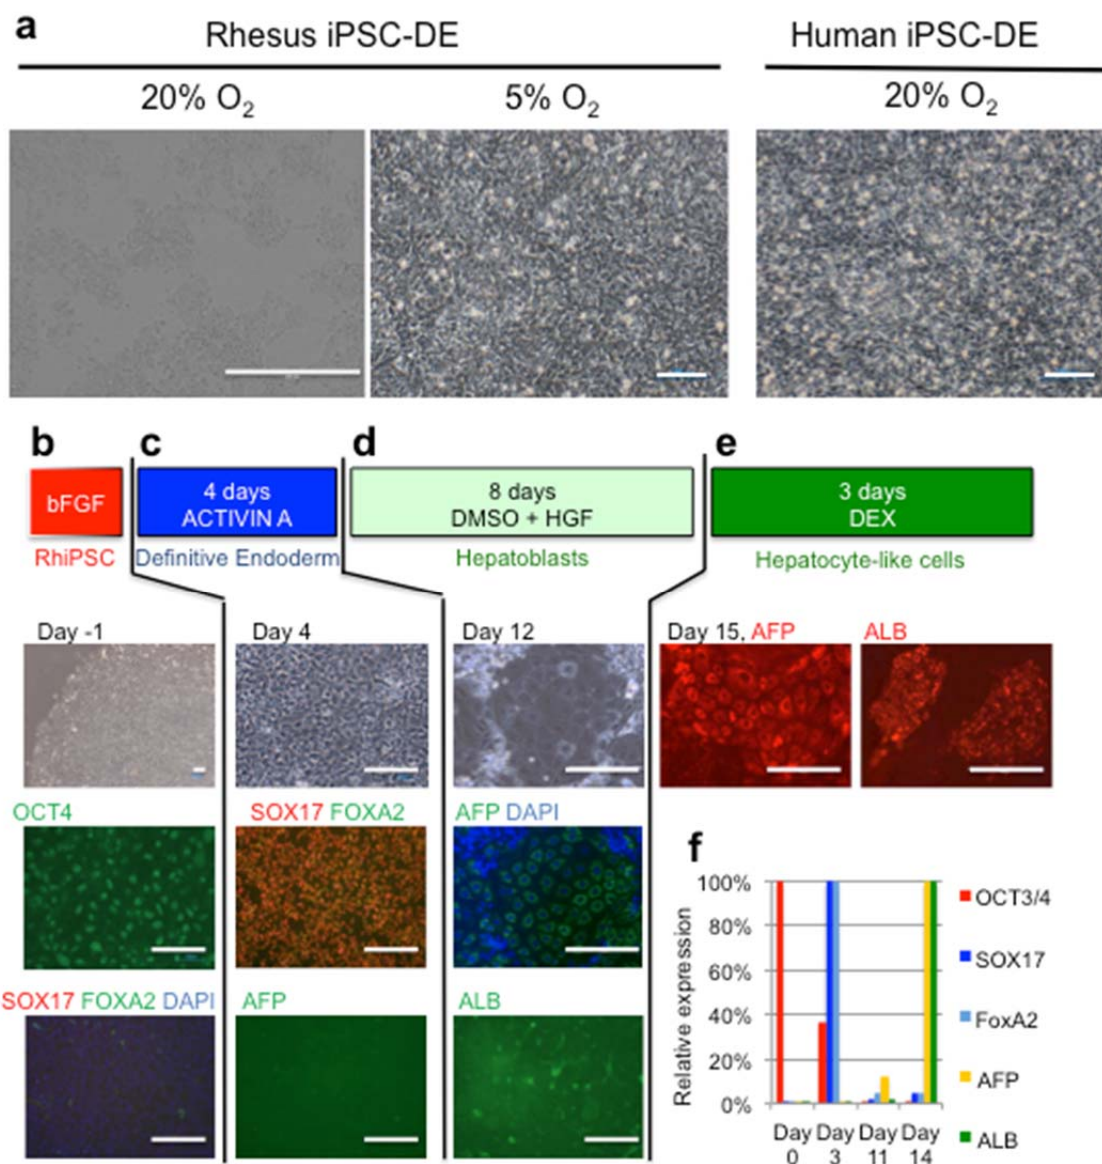

**Figure S7 Establishment of hepatic differentiation protocol for RhiPSC**

(a) 5% O<sub>2</sub> hypoxic culture was required for definitive endoderm (DE) induction from RhiPSC (b) Undifferentiated RhiPSCs before hepatic differentiation (c) After 4 days, RhiPSC-DE cells expressed SOX17 and FOXA2, but not AFP. (d) By Day 12, AFP+ hepatoblasts were derived. (e) After dexamethasone treatment, ALB+ hepatocyte-like cells were observed. (f) RT-PCR analysis of relevant transcripts during differentiation. Scale bars, 200 μm.

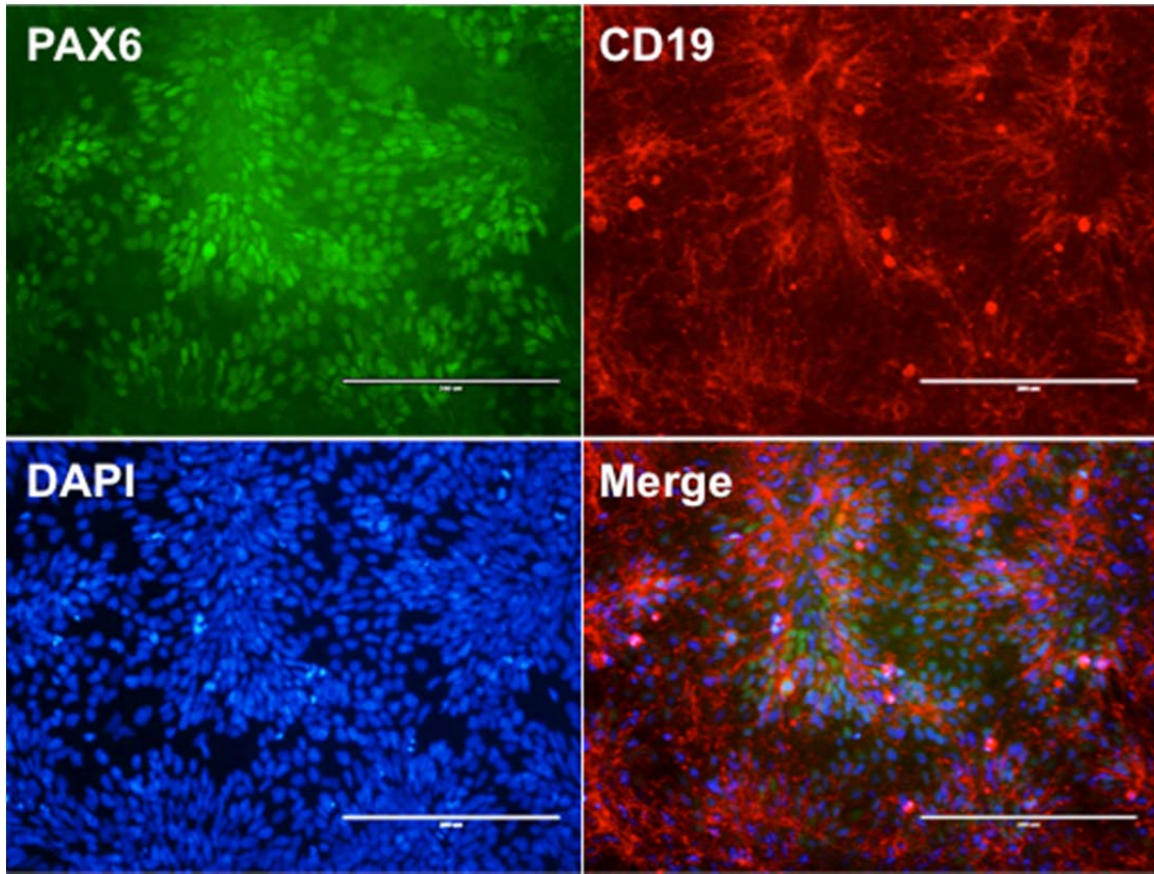

**Figure S8 Ectodermal differentiation from edited RhiPSCs**  
RhiPSC-h $\Delta$ CD19-7-derived neural stem cells co-expressed early neural marker, Pax6 and the transgene (h $\Delta$ CD19). Scale bars, 200  $\mu$ m.

**Table S1 Top 10 potential off-target sites**

|    | <b>Off-target Sequence</b> | <b>PAM</b> | <b>Chr</b> | <b>Position</b> | <b>Strand</b> | <b>MM Locations</b> | <b># of MMs</b> | <b>Score</b> | <b>Overlapping Gene<sup>a</sup></b> |
|----|----------------------------|------------|------------|-----------------|---------------|---------------------|-----------------|--------------|-------------------------------------|
| 1  | AGGGCCACTT<br>GGGACAGGAC   | TAG        | 4          | 7769928<br>4    | -             | 1,10                | 2               | 7.414830508  | None                                |
| 2  | GGCCCCACTA<br>GGGACAGGAC   | AAG        | 3          | 1603552<br>67   | +             | 3,4                 | 2               | 5.146703297  | CADPS2 <sup>b</sup>                 |
| 3  | GGGGCCAGTG<br>GGGACAGGAC   | AGG        | 13         | 1272827<br>74   | -             | 8,10                | 2               | 5.028448276  | None                                |
| 4  | GGCCCCATTA<br>GGGACAGGAC   | CAG        | 1          | 1853601<br>6    | +             | 3,4,8               | 3               | 2.448888889  | None                                |
| 5  | GGGACCATGA<br>GGGACAGGAC   | TGG        | 19         | 1914504<br>6    | -             | 4,8,9               | 3               | 1.51751634   | ENSMMUG0<br>0000003164 <sup>b</sup> |
| 6  | GGGGGCAGCA<br>GGGACAGGAC   | TGG        | 17         | 9356319<br>1    | -             | 5,8,9               | 3               | 1.482630907  | None                                |
| 7  | GGAGCTAATA<br>GGGACAGGAC   | TGG        | 14         | 3006406<br>2    | -             | 3,6,8               | 3               | 1.481577778  | None                                |
| 8  | GGGAGCACTA<br>AGGACAGGAC   | CGG        | 7          | 4697801<br>8    | -             | 4,5,11              | 3               | 1.446502058  | ITGA11 <sup>b</sup>                 |
| 9  | GGGAGCAGTG<br>GGGACAGGAC   | TGG        | 11         | 3181345         | -             | 4,5,8,10            | 4               | 1.257112069  | None                                |
| 10 | GGGGCCAGTG<br>GGGACAGGAA   | GGG        | 12         | 9580652<br>3    | -             | 8,10,20             | 3               | 1.141953521  | None                                |

MM stands for Mismatch.

<sup>a</sup>Gene information was found using BLAT online analysis ([www.ensembl.org](http://www.ensembl.org)).

<sup>b</sup>Off-target sequence is located in the intron of the corresponding gene.

**Table S2 List of primers and probes used in this study**

| Assay                                  | Gene/Target                  | Forward sequence (5'-3')                        | Reverse sequence (5'-3')                          |
|----------------------------------------|------------------------------|-------------------------------------------------|---------------------------------------------------|
| Gibson Assembly                        | Rhesus AAVS1 5' homology arm | tatgaccatgattacgccgccacctctt<br>caggttccagcttct | tatgctatacgaagttatgcctgtcctagtggcccc<br>acggtggg  |
|                                        | Rhesus AAVS1 3' homology arm | agtcagtgagaatattgttactgggtga<br>caaaaagcccatct  | taaaacgacggccagtgtttcggagcagggcctta<br>gggaagaggg |
|                                        | hΔCD19                       | tcattttggcaaagaattgtatgccacctc<br>ctcgctctcttct | gcacctgaggagtgaattcattagaatctcctggg<br>gggtcagtc  |
| PCR screening for targeted integration |                              | tcctgcttccactgacctgc                            | ggctgtactcggctatcctag                             |
| PPP1R12C expression                    | PPP1R12C-1 (primer #1)       | aggtggtgcgcttcttggtg                            | tgttgacggcggcgatgtg                               |
|                                        | PPP1R12C-2 (primer #2)       | tggtgcgcttcttggtggag                            | tgttgacggcggcgatgtg                               |
| T7E1 assay                             | RhAAVS1                      | tgctttcttgcctggacac                             | tgatgcacaggaacagtac                               |
| Off-target analysis                    | OT-1                         | agagagtgtgtaggtgggtatt                          | gcctcttggatggtgctataa                             |
|                                        | OT-2                         | aaagttcaaagtggagacagga                          | aagagcaagcaggggtgtta                              |
|                                        | OT-3                         | ccaggttagaggaggcataaac                          | ggaactgaagagatgcccaa                              |
|                                        | OT-4                         | ttgaaccgtgctcctagc                              | gctggacttcaggcctattt                              |
|                                        | OT-5                         | gctcatcttgagagagagaagaaa                        | gctgtagcgggttatttgaatg                            |
|                                        | OT-6                         | atgcacaagcgtgcctt                               | atccatgaagcctccaagatg                             |
|                                        | OT-7                         | ttctggtggttacacttcattca                         | agggctctttgacagatcattac                           |
|                                        | OT-8                         | ggttactgttcttagccactgt                          | gactcagggaatgcgtttct                              |
|                                        | OT-9                         | tgtgaggtactgtgcctgga                            | gaaaggcattgcattagga                               |
|                                        | OT-10                        | tccacctctcaggttcaagc                            | accgaaggaaccttgcctt                               |

OT: predicted potential off-target locus
